# 1 pGG-PIP: A GreenGate (GG) entry vector collection with Plant Immune system Promoters 2 (PIP)

3 Jacob Calabria<sup>1,2,a</sup>, Madlen I. Rast-Somssich<sup>2,5,b,#</sup>, Liu Wang<sup>1,3,6,c,#</sup>, Hsiang-Wen Chen<sup>1,3,d</sup>,  
4 Michelle Watt<sup>2,e</sup>, Alexander Idnurm<sup>4,f</sup>, Staffan Persson<sup>3,6,g</sup>, and Marc Somssich<sup>1,7,h,\*</sup>

5 <sup>1</sup> Plant-Fusarium Interactions Research Team, School of BioSciences, University of Melbourne, Parkville, Australia

6 <sup>2</sup> Crop Root Physiology Lab, School of BioSciences, University of Melbourne, Parkville, Australia

7 <sup>3</sup> Plant Cell Biology Lab, School of BioSciences, University of Melbourne, Parkville, Australia

8 <sup>4</sup> Mycology Laboratory, School of BioSciences, University of Melbourne, Parkville, Australia

9 <sup>5</sup> Current address: Institute for Molecular Physiology, Heinrich Heine University, Düsseldorf, Germany

10 <sup>6</sup> Current address: Copenhagen Plant Science Center, University of Copenhagen, Frederiksberg C, Denmark

11 <sup>7</sup> Current address: Max Planck Institute for Plant Breeding Research, Cologne, Germany

12 Twitter: <sup>a</sup> @jacobcalabria, <sup>b</sup> @MSomssich, <sup>c</sup> @Liu\_Wang1, <sup>d</sup> @HsiangWen\_Chen, <sup>e</sup> @MelbourneRoots, <sup>f</sup>

13 @AlexanderIdnurm, <sup>g</sup> @perssonlab1, <sup>h</sup> @somssichm

14 # These two authors contributed equally

15 \* For correspondence: [marc.somssich@unimelb.edu.au](mailto:marc.somssich@unimelb.edu.au)

## 16 Abstract

17 The regulatory sequences controlling the expression of a gene (i.e., the promoter) are essential to  
18 properly understand a gene's function. From their use in mutant complementation assays, to  
19 studying their responsiveness to different stimuli via transcriptional reporter lines or using them  
20 as proxy for the activation of certain pathways, assays using promoter sequences are valuable tools  
21 for insight into the genetic architecture underlying plant life. The GreenGate (GG) system is a  
22 plant-specific variant of the Golden Gate assembly method, a modular cloning system that allows  
23 the hierarchical assembly of individual donor DNA fragments into one expression clone via a  
24 single reaction step. Here, we present a collection of 75 GG entry vectors carrying putative  
25 regulatory sequences for *Arabidopsis thaliana* genes involved in many different pathways of the  
26 plant immune system, designated Plant Immune system Promoters (PIP). This pGG-PIP entry  
27 vector set enables the rapid assembly of expression vectors to be used for transcriptional reporters  
28 of plant immune system components, mutant complementation assays when coupled with coding  
29 sequences, mis-expression experiments for genes of interest, or the targeted use of CRISPR/Cas9  
30 genome editing. We used pGG-PIP vectors to create fluorescent transcriptional reporters in *A.*  
31 *thaliana* and demonstrated the potential of these reporters to image the responsiveness of specific

32 plant immunity genes to infection and colonization by the fungal pathogen *Fusarium oxysporum*.  
33 Using the PLANT ELICITOR PEPTIDE (PEP) pathway as an example, we show that several  
34 components of this pathway are locally activated in response to colonization by the fungus.

### 35 **Keywords**

36 Golden Gate; GreenGate; plant immunity; *Arabidopsis thaliana*; plant-microbe interactions;  
37 promoters; transcriptional reporters; PLANT ELICITOR PEPTIDE; synthetic biology; *Fusarium*  
38 *oxysporum*

### 39 **Introduction**

40 Since the development of molecular cloning in the early 1970s, the isolation of genes and  
41 promoters, and subsequent transgenesis of model organisms, has become standard practice in the  
42 life sciences (Somssich, 2022). The development of more advanced cloning methods, particularly  
43 the recombination-based Gateway technology in the year 2000, made the creation of expression  
44 clones ready for transformation ever easier (Hartley *et al.*, 2000). However, with the rise of the  
45 synthetic biology field, it is now no longer sufficient for these methods to facilitate the cloning of  
46 individual DNA fragments. To recreate entire pathways and gene circuits in plants and other model  
47 organisms, larger DNA constructs need to be readily assembled from individual components, and  
48 these distinct building blocks need to be compatible to allow the flexibility to mix and match  
49 different promoters, coding sequences, protein tags, terminators, and resistance genes for selection  
50 of transgenic lines (Meng and Ellis, 2020). This requirement was met with the new modular  
51 cloning techniques which use recombination-based hierarchical assembly of multiple donor-  
52 modules (each containing, for example, a promoter of choice, tag of choice, gene of interest, etc.)  
53 into one ordered expression clone to be used for transgenesis (Fig. 1) (Bird *et al.*, 2022). Among  
54 the developed modular cloning methods, the Golden Gate system has emerged as the most widely  
55 utilized version, and in 2013 Lampropoulos *et al.* developed the plant-specific GreenGate variant  
56 of the Golden Gate technique (Engler *et al.*, 2008, 2009; Weber *et al.*, 2011; Lampropoulos *et al.*,  
57 2013). The GreenGate toolkit provides users with a wide range of entry vectors that serve as donors  
58 for standard promoters (e.g. CaMV35S, UBQ10), protein tags (e.g. GFP, NLS, HDEL),  
59 terminators (e.g. CaMV35S, UBQ10) and plant resistance cassettes (e.g. BastaR, HygR, KanR),  
60 to build basic gene expression modules for plants.

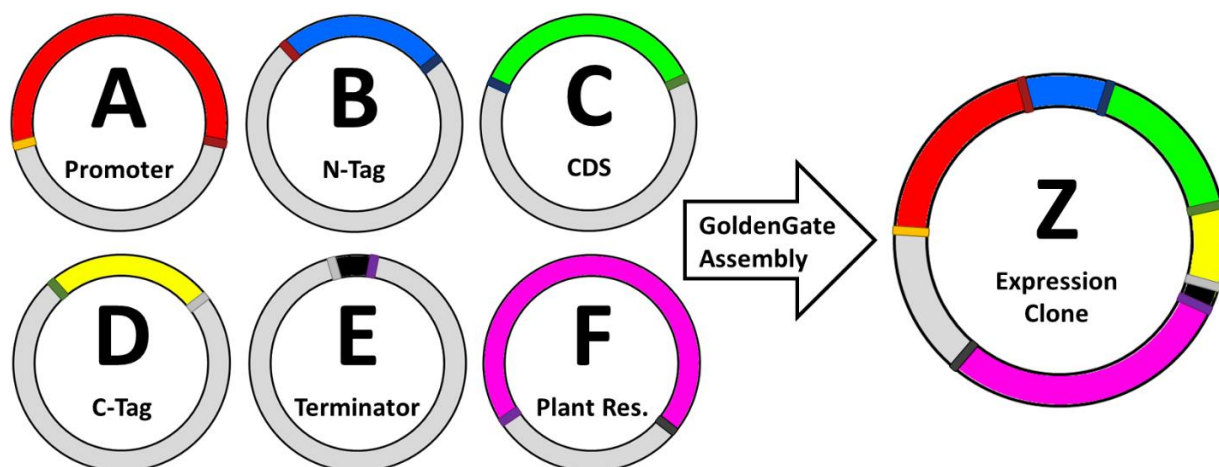

**Figure 1: Overview of the modular Golden/GreenGate cloning principle**

The promoter, N- and C-terminal tags, the gene-of-interest coding sequence (CDS), a terminator, and a plant resistance cassette are all cloned into individual entry clones (A-F), which are then combined with an 'empty' destination clone (Z) in the Golden Gate assembly mix. During the assembly reaction, the *BsaI* restriction enzyme cuts the different fragments from their respective entry clones. These fragments subsequently self-align via complementary four base pair overhangs (indicated by the thin colored borders on each entry vector; complementary overhangs that will align have the same color), and the T4 DNA-ligase fuses the individual fragments in the final expression clone (Z) that can be used to transform plants.

61 Additional kits have been developed and added to the GreenGate toolbox since 2013, providing  
62 entry vector sets to build plasmids for CRISPR/Cas9-guided genome editing (Wu *et al.*, 2018),  
63 CRISPR/Cas9-guided tissue-specific gene knockout (Decaestecker *et al.*, 2019) and inducible and  
64 cell-type specific gene expression (Schürholz *et al.*, 2018). In addition, a toolbox of fluorescent  
65 proteins suitable for work in plants (Denay *et al.*, 2019), along with the necessary clones for *in*  
66 *planta* proximity ligation assays using the biotin ligase (Goslin *et al.*, 2021), and destination  
67 vectors with an already integrated plasma membrane-marker (Kümpers *et al.*, 2022) have been  
68 designed. The development and availability of these various toolboxes, all compatible with each  
69 other, demonstrate the usefulness of such modular systems to enable researchers to quickly adopt  
70 new technologies, providing the flexibility and versatility to combine and recombine their existing  
71 vectors (i.e., modules) with new vectors from all other kits.

72 In our work we use a microscopy-based live-imaging approach to monitor the *Arabidopsis*  
73 *thaliana*'s defense responses to infection and colonization by the pathogenic fungus *Fusarium*  
74 *oxysporum* strain Fo5176 (Fo5176) on an individual cell level (Calabria *et al.*, 2022; Wang *et al.*,  
75 2022a). Fluorescent transcriptional reporters are a good tool for such studies, as activation of  
76 certain pathways is typically associated with transcriptional upregulation (Ngou *et al.*, 2021).  
77 However, most studies investigating the transcriptional responsiveness of certain pathways to

78 pathogens tend to use transcriptomic analyses of whole tissues, organs, or seedlings, therefore  
79 losing all spatial resolution and differences between cell groups and even individual cells. The  
80 responses of only the few cells that could be the major contributors to a host-microbe outcome are  
81 also typically lost in such experiments, as they are below the threshold of background noise. A  
82 microscopy-based approach that allows for the spatial resolution and observation of responses in  
83 individual cells therefore closes this knowledge gap. One reason why such an approach is not more  
84 common is that a prerequisite for this work is the availability of fluorescent reporter lines for all  
85 the different plant immune pathways to be investigated. To this end, we have cloned the putative  
86 regulatory sequences (i.e., promoters) of 75 *A. thaliana* genes, representing many of the major  
87 branches of the plant immune system (Fig. 2 and Table 1). We have done so using the GreenGate  
88 cloning system, therefore creating a GreenGate plant promoter entry vector set that is compatible  
89 with all other GreenGate-based toolkits, and that we believe will be a valuable tool for the scientific  
90 community.

91 As a proof-of-principle, we selected a number of these promoters to create fluorescent  
92 transcriptional reporter lines for genes involved in the PLANT ELICITOR PEPTIDE (PEP)-  
93 pathway. The PEP pathway is involved in the immune response to several plant pathogens,  
94 including bacteria, fungi and oomycetes (Saijo *et al.*, 2018). The PEP1-6 peptides function as  
95 phytosulfokines. They are expressed as part of the plant's pattern-triggered immunity (PTI)  
96 response and trigger cell autonomous and non-autonomous defense responses when they are  
97 perceived by the plasma membrane localized receptors PEPR1 and PEPR2 (Yamaguchi *et al.*,  
98 2006, 2010; Saijo *et al.*, 2018). For their function, they require the intracellular kinase BIK1, which  
99 activates the NADPH oxidase RBOHD to trigger a ROS-burst, and also induces defense gene  
100 expression (Liu *et al.*, 2013; Kadota *et al.*, 2014; Saijo *et al.*, 2018; Jing *et al.*, 2020). A role for  
101 the PEP pathway in the defense against fungal disease has been hypothesized, based on large-scale  
102 transcriptomic data. Plants carrying mutations in *MEDIATOR18* and *20* show increased resistance  
103 to infection by *F. oxysporum* strain *Fo5176*, and mRNA sequencing has demonstrated that *PEP1*  
104 is among the genes no longer induced after infection of these mutant plants (Fallath *et al.*, 2017;  
105 Wang *et al.*, 2022a). Similarly, *PEPR1* and *2* were among the genes suppressed by the endophytic  
106 *F. oxysporum* strain *Fo47*, indicating that the PEP pathway normally acts to restrict fungal  
107 colonization (Guo *et al.*, 2021; Wang *et al.*, 2022a). However, no detailed data is available. Here,  
108 we show that colonization of the *A. thaliana* vasculature is accompanied by a highly localized



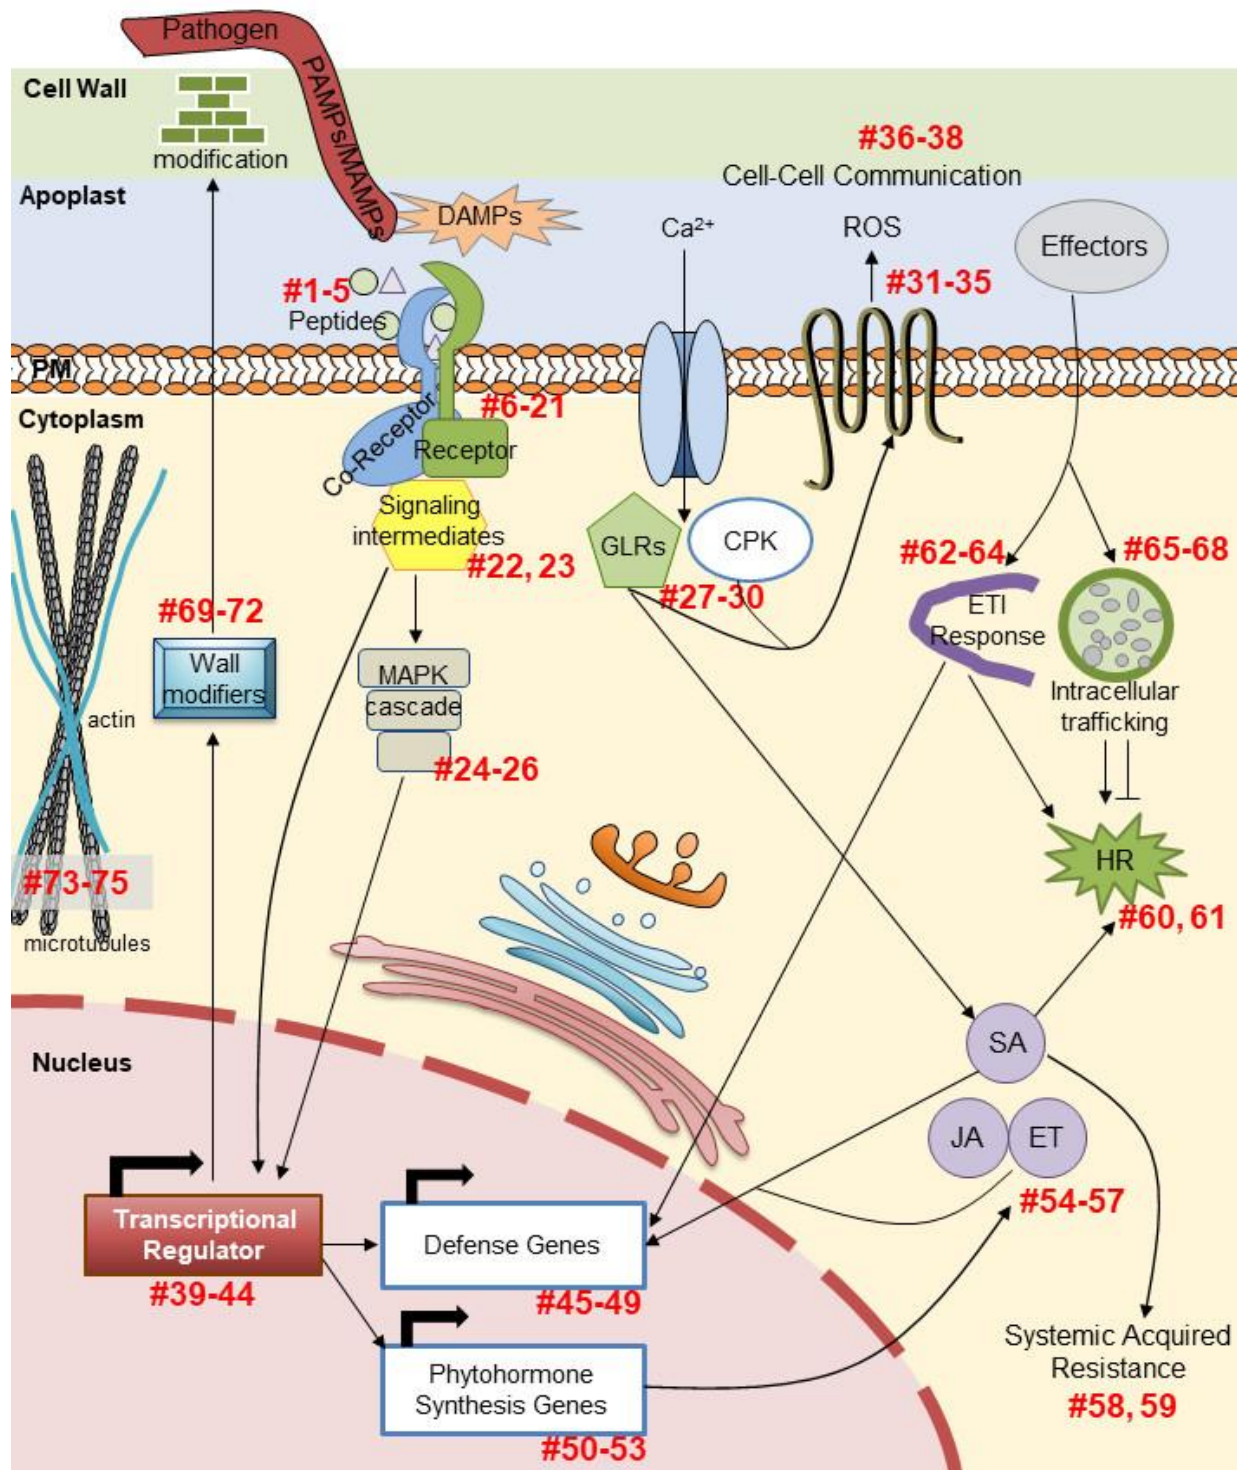

**Figure 2: Overview of the different immune pathways represented in the pGG-PIP collection**

The red numbers correspond to the pGG-PIP plasmid numbers in column one of [Table 1](#).

109 activation of this pathway via upregulation of genes encoding the peptide ligand PEP1, as well as  
 110 the cognate PEP RECEPTORS 1 and 2, the downstream signaling intermediate BIK1 and the  
 111 NADPH oxidase RBOHD.

## 112 **Results**

### 113 **Selection and cloning of the promoters**

114 By using these putative promoter sequences for the construction of transcriptional reporter lines,  
115 our main aim is to obtain information about the specific localized activation of different immune  
116 pathways in response to infection by a pathogen, in our case *Fo5176*. Once we have identified  
117 pathways involved in the plant's defense against this strain, we plan to further extend these  
118 experiments based on what is known about the function of these pathways. Thus, it is important to  
119 select promoters from many different pathways of the plant immune system, but also from  
120 pathways that are particularly well understood, since this existing knowledge will guide our future  
121 work. Some of the best studied immune pathways in the plant are the pattern-recognition flagellin  
122 (flg) and elongation factor thermos unstable (EF-Tu) pathways, the phytohormones jasmonic acid  
123 (JA), salicylic acid (SA) and ethylene (ET), and the transcriptional activity of several WRKY  
124 transcription factors. We therefore selected representative gene promoters from such well  
125 understood pathways, but also additional candidates such as MAP and calcium-dependent protein  
126 kinases (MPKs, CPKs), genes involved in production and signaling via reactive oxygen species  
127 (ROS), and genes involved in effector-triggered immunity (ETI) responses via the EDS1-PAD4  
128 module. **Figure 2** and **Table 1** provide a complete overview of the 75 promoters included in the  
129 pGG-PIP collection. The numbers in **Fig. 2** correspond to the pGG-PIP plasmid number in the first  
130 column of **Table 1**.

131 For the construction of the pGG-PIP plasmids, we considered the entire stretch of DNA from the  
132 3' upstream neighboring gene's coding sequence to the ATG of the gene of interest as the gene's  
133 putative regulatory sequences, and thus its 'promoter'. There are a few exceptions to this rule,  
134 where we used a defined stretch of DNA that has previously been described to complement a  
135 mutant (e.g., *FMO1*, *RPS4* (Wirthmueller *et al.*, 2007; Joglekar *et al.*, 2018)). Where present, this  
136 may include untranslated regions (UTRs), pseudogenes, or transposons, since these elements could  
137 indeed affect expression of a gene *in planta*. For the recombination-based cloning, the *BsaI*  
138 recognition site and standard four base pair GreenGate A overhangs (5'-ACCT and TTGT-3')  
139 were added via primers during amplification of the promoter sequences (see **Supplementary Table**  
140 **1** for a list of primer sequences). If the promoter sequence contained an internal *BsaI* restriction  
141 site (GGTCTC), we mutated a single base, usually a G to a C via scar-free *BsaI* cloning, i.e., we

142 inserted the base mutation by making it part of the four base pair overhang used for the scar-free  
 143 cloning (see **Table 1** for the exact sequence edits made, and **Supplementary Table 1** for primer  
 144 sequences). The promoters were then transferred into the GreenGate promoter entry vector  
 145 pGGA000 via the four base pair A overhangs in a Golden Gate assembly reaction.

| GG-PIP plasmid | Gene           | Bases | BsaI site edits | Protein function                                                                           | Full gene name                                              | Gene code |
|----------------|----------------|-------|-----------------|--------------------------------------------------------------------------------------------|-------------------------------------------------------------|-----------|
| pGG-PIP01      | <i>PEP1</i>    | 1907  |                 | Activate defense genes (Yamada <i>et al.</i> , 2016)                                       | <i>PLANT ELICITOR PEPTIDE 1</i>                             | AT5G64900 |
| pGG-PIP02      | <i>PEP2</i>    | 769   |                 | Activate defense genes (Yamada <i>et al.</i> , 2016)                                       | <i>PLANT ELICITOR PEPTIDE 2</i>                             | AT5G64890 |
| pGG-PIP03      | <i>PEP3</i>    | 1694  |                 | Activate defense genes (Yamada <i>et al.</i> , 2016)                                       | <i>PLANT ELICITOR PEPTIDE 3</i>                             | AT5G64905 |
| pGG-PIP04      | <i>RALF23</i>  | 2027  | 1458 C → G      | Phytosulfokine sensed by FER (Stegmann <i>et al.</i> , 2017)                               | <i>ARABIDOPSIS RAPID ALKALINIZATION FACTOR 23</i>           | AT3G16570 |
| pGG-PIP05      | <i>SCOOP12</i> | 2900  |                 | Phytosulfokine sensed by MIK2/BAK1 (Hou <i>et al.</i> , 2021; Rhodes <i>et al.</i> , 2021) | <i>PRECURSOR OF SERINE-RICH ENDOGENOUS PEPTIDE 12</i>       | AT5G44585 |
| pGG-PIP06      | <i>BAK1</i>    | 1731  |                 | Co-receptor for several defense & development pathways (Greenwood and Williams, 2022)      | <i>BRI1-ASSOCIATED RECEPTOR KINASE</i>                      | AT4G33430 |
| pGG-PIP07      | <i>CERK1</i>   | 493   |                 | Chitin-receptor (Cao <i>et al.</i> , 2014)                                                 | <i>CHITIN ELICITOR RECEPTOR KINASE 1</i>                    | AT3G21630 |
| pGG-PIP08      | <i>CIPP1</i>   | 3003  |                 | CERK1 co-receptor (Liu <i>et al.</i> , 2018)                                               | <i>CERK-1 INTERACTING PROTEIN PHOSPHATASE 1</i>             | AT1G34750 |
| pGG-PIP09      | <i>CORK1</i>   | 3376  |                 | DAMP-receptor (Tseng <i>et al.</i> , 2022)                                                 | <i>CELLOOLIGOMER RECEPTOR KINASE 1</i>                      | AT1G56145 |
| pGG-PIP10      | <i>EFR</i>     | 2376  |                 | Receptor for EF-Tu (Couto and Zipfel, 2016)                                                | <i>EF-TU RECEPTOR</i>                                       | AT5G20480 |
| pGG-PIP11      | <i>FER</i>     | 1243  |                 | Co-receptor for several defense & development pathways (Duan <i>et al.</i> , 2022)         | <i>FERONIA</i>                                              | AT3G51550 |
| pGG-PIP12      | <i>FLS2</i>    | 2913  |                 | Receptor for bacterial flagellin (Couto and Zipfel, 2016)                                  | <i>FLAGELLIN-SENSITIVE 2</i>                                | AT5G46330 |
| pGG-PIP13      | <i>LYK5</i>    | 1560  | 1215 G → C      | CERK1 co-receptor (Cao <i>et al.</i> , 2014)                                               | <i>LYSM-CONTAINING RECEPTOR-LIKE KINASE 5</i>               | AT2G33580 |
| pGG-PIP14      | <i>LYM1</i>    | 991   |                 | Fungal MAMP receptor (Zipfel and Oldroyd, 2017)                                            | <i>LYSM DOMAIN GPI-ANCHORED PROTEIN 1 PRECURSOR</i>         | AT1G21880 |
| pGG-PIP15      | <i>MIK2</i>    | 2513  |                 | SCOOP peptide receptor (Hou <i>et al.</i> , 2021; Rhodes <i>et al.</i> , 2021)             | <i>MALE DISCOVERER 1-INTERACTING RECEPTOR-LIKE KINASE 2</i> | AT4G08850 |
| pGG-PIP16      | <i>PEPR1</i>   | 931   | 180 G → A       | Receptor for PEP1-6 (Yamada <i>et al.</i> , 2016)                                          | <i>PEP1 RECEPTOR 1</i>                                      | AT1G73080 |
| pGG-PIP17      | <i>PEPR2</i>   | 1676  |                 | Receptor for PEP1 & 2 (Yamada <i>et al.</i> , 2016)                                        | <i>PEP1 RECEPTOR 2</i>                                      | AT1G17750 |
| pGG-PIP18      | <i>RFO1</i>    | 850   |                 | Cell wall-associated kinase (Huerta <i>et al.</i> , 2023)                                  | <i>RESISTANCE TO FUSARIUM OXYSPORUM 1</i>                   | AT1G79670 |
| pGG-PIP19      | <i>RLP26</i>   | 822   |                 | Co-receptor for PRR receptors (Wu <i>et al.</i> , 2016)                                    | <i>RECEPTOR LIKE PROTEIN 26</i>                             | AT2G33050 |
| pGG-PIP20      | <i>RLP29</i>   | 2790  |                 | Co-receptor for PRR receptors (Wu <i>et al.</i> , 2016)                                    | <i>RECEPTOR LIKE PROTEIN 29</i>                             | AT2G42800 |
| pGG-PIP21      | <i>SOBIR1</i>  | 1163  |                 | Co-receptor for several defense pathways (Cho <i>et al.</i> , 2022)                        | <i>SUPPRESSOR OF BIR 1 / EVERSHEDED</i>                     | AT2G31880 |
| pGG-PIP22      | <i>BIK1</i>    | 2668  |                 | Defense signaling (Gonçalves Dias <i>et al.</i> , 2022)                                    | <i>BOTRYTIS-INDUCED KINASE1</i>                             | AT2G39660 |
| pGG-PIP23      | <i>XLG2</i>    | 1256  |                 | G protein involved in immunity (Petutschnig <i>et al.</i> , 2022)                          | <i>EXTRA-LARGE GTP-BINDING PROTEIN 2</i>                    | AT4G34390 |
| pGG-PIP24      | <i>MPK3</i>    | 654   |                 | Activates immune response (Tsuda and Somssich, 2015)                                       | <i>MITOGEN-ACTIVATED PROTEIN KINASE 3</i>                   | AT3G45640 |
| pGG-PIP25      | <i>MPK4</i>    | 1025  |                 | Activates immune response (Tsuda and Somssich, 2015)                                       | <i>MITOGEN-ACTIVATED PROTEIN KINASE 4</i>                   | AT4G01370 |

|           |                   |      |                 |                                                                                |                                                                    |                  |
|-----------|-------------------|------|-----------------|--------------------------------------------------------------------------------|--------------------------------------------------------------------|------------------|
| pGG-PIP26 | <i>MPK6</i>       | 811  |                 | Activates immune response (Tsuda and Somssich, 2015)                           | <i>MITOGEN-ACTIVATED PROTEIN KINASE 6</i>                          | <i>AT2G43790</i> |
| pGG-PIP27 | <i>CPK5</i>       | 1983 |                 | Involved in calcium-dependent stress responses (Gao and He, 2013)              | <i>CALMODULIN-DOMAIN PROTEIN KINASE 5</i>                          | <i>AT4G35310</i> |
| pGG-PIP28 | <i>CPK29</i>      | 826  | 325 G->C        | Involved in calcium-dependent stress responses (Patil and Senthil-Kumar, 2020) | <i>CALCIUM-DEPENDENT PROTEIN KINASE 29</i>                         | <i>AT1G76040</i> |
| pGG-PIP29 | <i>GLR2.5</i>     | 2488 | 1488, 1489 G->C | Involved in defense-development balancing (Birkenbihl <i>et al.</i> , 2017a)   | <i>GLUTAMATE RECEPTOR 2.5</i>                                      | <i>AT5G11210</i> |
| pGG-PIP30 | <i>GLR2.7</i>     | 4000 |                 | Involved in defense-development balancing (Birkenbihl <i>et al.</i> , 2017a)   | <i>GLUTAMATE RECEPTOR 2.7</i>                                      | <i>AT2G29120</i> |
| pGG-PIP31 | <i>RBOHD</i>      | 2309 |                 | Produces ROS-burst (Kadota <i>et al.</i> , 2014)                               | <i>RESPIRATORY BURST OXIDASE HOMOLOGUE D</i>                       | <i>AT5G47910</i> |
| pGG-PIP32 | <i>RBOHF</i>      | 4119 |                 | Produces ROS-burst (Morales <i>et al.</i> , 2016)                              | <i>RESPIRATORY BURST OXIDASE HOMOLOG F</i>                         | <i>AT1G64060</i> |
| pGG-PIP33 | <i>EX1</i>        | 989  |                 | Produces ROS from chloroplasts (Dogra <i>et al.</i> , 2022)                    | <i>EXECUTER 1</i>                                                  | <i>AT4G33630</i> |
| pGG-PIP34 | <i>HPCA1</i>      | 2944 |                 | ROS-sensor (Sun and Zhang, 2021)                                               | <i>HP-INDUCED Ca2+ INCREASES 1</i>                                 | <i>AT5G49760</i> |
| pGG-PIP35 | <i>RCD1</i>       | 3137 | 2888 G->C       | Modulator of root-to-shoot ROS-signaling (Jin <i>et al.</i> , 2022)            | <i>RADICAL-INDUCED CELL DEATH1</i>                                 | <i>AT1G32230</i> |
| pGG-PIP36 | <i>DORN1</i>      | 2325 |                 | eATP DAMP-receptor (Sun and Zhang, 2021)                                       | <i>DOES NOT RESPOND TO NUCLEOTIDES 1</i>                           | <i>AT5G60300</i> |
| pGG-PIP37 | <i>LECRK-VI.2</i> | 1183 |                 | NAD(P)-receptor (Sun and Zhang, 2021)                                          | <i>L-TYPE LECTIN RECEPTOR KINASE-VI.2</i>                          | <i>AT5G01540</i> |
| pGG-PIP38 | <i>BPS1</i>       | 2142 |                 | Regulator of root-to-shoot communication (Lee <i>et al.</i> , 2016)            | <i>BYPASS 1</i>                                                    | <i>AT1G01550</i> |
| pGG-PIP39 | <i>WRKY11</i>     | 2026 | 240 C->G        | Regulates defense gene expression (Journot-Catalino <i>et al.</i> , 2006)      | <i>WRKY DNA-BINDING PROTEIN 11</i>                                 | <i>AT4G31550</i> |
| pGG-PIP40 | <i>WRKY17</i>     | 4565 | 4325 G->C       | Regulates defense gene expression (Birkenbihl <i>et al.</i> , 2018)            | <i>WRKY DNA-BINDING PROTEIN 17</i>                                 | <i>AT2G24570</i> |
| pGG-PIP41 | <i>WRKY33</i>     | 1665 |                 | Regulates defense gene expression (Birkenbihl <i>et al.</i> , 2018)            | <i>WRKY DNA-BINDING PROTEIN 33</i>                                 | <i>AT4G23810</i> |
| pGG-PIP42 | <i>WRKY40</i>     | 4158 |                 | Regulates defense gene expression (Birkenbihl <i>et al.</i> , 2018)            | <i>WRKY DNA-BINDING PROTEIN 40</i>                                 | <i>AT1G80840</i> |
| pGG-PIP43 | <i>WRKY53</i>     | 2515 |                 | Regulates defense gene expression (Birkenbihl <i>et al.</i> , 2017b)           | <i>WRKY DNA-BINDING PROTEIN 53</i>                                 | <i>AT2G38470</i> |
| pGG-PIP44 | <i>WRKY70</i>     | 4099 |                 | Regulates defense gene expression (Journot-Catalino <i>et al.</i> , 2006)      | <i>WRKY DNA-BINDING PROTEIN 70</i>                                 | <i>AT3G56400</i> |
| pGG-PIP45 | <i>ELI-3</i>      | 524  |                 | Elicitor-response gene (Tanaka <i>et al.</i> , 2018)                           | <i>CINNAMYL-ALCOHOL DEHYDROGENASE 7 / ELICITOR-ACTIVATED GENE3</i> | <i>AT4G37980</i> |
| pGG-PIP46 | <i>FRK1</i>       | 1271 |                 | Defense gene (Birkenbihl <i>et al.</i> , 2017b)                                | <i>FLG22-INDUCED RECEPTOR-LIKE KINASE 1</i>                        | <i>AT2G19190</i> |
| pGG-PIP47 | <i>MLO6</i>       | 3042 |                 | Defense gene (Acevedo-Garcia <i>et al.</i> , 2017)                             | <i>MILDEW RESISTANCE LOCUS O 6</i>                                 | <i>AT1G61560</i> |
| pGG-PIP48 | <i>PER5</i>       | 2007 | 558 C->G        | Marker for activated immune signalling (Chuberre <i>et al.</i> , 2018)         | <i>PEROXIDASE 5</i>                                                | <i>AT1G14550</i> |
| pGG-PIP49 | <i>PLP1</i>       | 2490 |                 | Pathogen-induced (Yang <i>et al.</i> , 2007)                                   | <i>PATATIN-LIKE PROTEIN 1</i>                                      | <i>AT4G37070</i> |
| pGG-PIP50 | <i>ACS2</i>       | 2914 | 150 C->G        | ET biosynthesis (Wang <i>et al.</i> , 2022c)                                   | <i>1-AMINO-CYCLOPROPANE-1-CARBOXYLATE SYNTHASE 2</i>               | <i>AT1G01480</i> |
| pGG-PIP51 | <i>AOS</i>        | 2093 | 2088 G->C ;     | JA biosynthesis (Yang <i>et al.</i> , 2019)                                    | <i>ALLENE OXIDE SYNTHASE</i>                                       | <i>AT5G42650</i> |



|           |                 |      |                          |                                                                                          |                                                             |                  |
|-----------|-----------------|------|--------------------------|------------------------------------------------------------------------------------------|-------------------------------------------------------------|------------------|
|           |                 |      | 1434<br>G->C             |                                                                                          |                                                             |                  |
| pGG-PIP52 | <i>ARR5</i>     | 2229 | 639 C -> G               | Cytokinin signaling (Lee <i>et al.</i> , 2016)                                           | <i>ARABIDOPSIS RESPONSE REGULATOR 5</i>                     | <i>AT3G48100</i> |
| pGG-PIP53 | <i>EDS16</i>    | 2975 | 1579 G->C ;<br>1049 C->G | SA biosynthesis (Calabria <i>et al.</i> , 2022)                                          | <i>ENHANCED DISEASE SUSCEPTIBILITY TO ERYSPHEORONTII 16</i> | <i>AT1G74710</i> |
| pGG-PIP54 | <i>ERF1</i>     | 2682 |                          | ET & JA response regulator (Wang <i>et al.</i> , 2022c)                                  | <i>ETHYLENE RESPONSE FACTOR 1</i>                           | <i>AT3G23240</i> |
| pGG-PIP55 | <i>PDF1.2</i>   | 1540 |                          | ET & JA-induced defense gene (Yang <i>et al.</i> , 2019)                                 | <i>PLANT DEFENSIN 1.2</i>                                   | <i>AT5G44420</i> |
| pGG-PIP56 | <i>PR1</i>      | 2343 |                          | SA-induced defense gene (Yang <i>et al.</i> , 2019)                                      | <i>PATHOGENESIS-RELATED GENE 1</i>                          | <i>AT2G14610</i> |
| pGG-PIP57 | <i>VSP2</i>     | 1471 |                          | JA-induced defense gene (Yang <i>et al.</i> , 2019)                                      | <i>VEGETATIVE STORAGE PROTEIN 2</i>                         | <i>AT5G24770</i> |
| pGG-PIP58 | <i>FMO1</i>     | 1726 |                          | Systemic acquired resistance marker (Joglekar <i>et al.</i> , 2018)                      | <i>FLAVIN-DEPENDENT MONOOXYGENASE 1</i>                     | <i>AT1G19250</i> |
| pGG-PIP59 | <i>MYB72</i>    | 4619 |                          | Involved in induced systemic resistance                                                  | <i>ARABIDOPSIS THALIANA MYB DOMAIN PROTEIN 72</i>           | <i>AT1G56160</i> |
| pGG-PIP60 | <i>CSLD2</i>    | 1963 |                          | Marker for cell death, possibly via ET-signaling (Salguero-Linares <i>et al.</i> , 2022) | <i>CELLULOSE-SYNTHASE LIKE D2</i>                           | <i>AT5G16910</i> |
| pGG-PIP61 | <i>HRM1</i>     | 2238 |                          | Marker for cell death (Salguero-Linares <i>et al.</i> , 2022)                            | <i>HYPERSENSITIVE RESPONSE MARKER 1</i>                     | <i>AT5G17760</i> |
| pGG-PIP62 | <i>EDS1</i>     | 1419 | 848 A->T ;<br>1269 G->C  | Involved in ETI-signaling (Jia <i>et al.</i> , 2022)                                     | <i>ENHANCED DISEASE SUSCEPTIBILITY 1</i>                    | <i>AT3G48090</i> |
| pGG-PIP63 | <i>PAD4</i>     | 1596 |                          | Involved in ETI-signaling (Jia <i>et al.</i> , 2022)                                     | <i>PHYTOALEXIN DEFICIENT 4</i>                              | <i>AT3G52430</i> |
| pGG-PIP64 | <i>RPS4</i>     | 511  |                          | NLR effector receptor (Jia <i>et al.</i> , 2022)                                         | <i>RESISTANT TO P. SYRINGAE 4</i>                           | <i>AT5G45250</i> |
| pGG-PIP65 | <i>ATG8A</i>    | 1408 |                          | Autophagy marker (Yang <i>et al.</i> , 2018)                                             | <i>AUTOPHAGY-RELATED 8A</i>                                 | <i>AT4G21980</i> |
| pGG-PIP66 | <i>TET8</i>     | 2068 |                          | Targets vesicular transport to infection sites (Cai <i>et al.</i> , 2018)                | <i>TETRASPANIN8</i>                                         | <i>AT2G23810</i> |
| pGG-PIP67 | <i>SULTR4;1</i> | 2087 |                          | Sulfate transporter (Wang <i>et al.</i> , 2022b)                                         | <i>SULFATE TRANSPORTER 4.1</i>                              | <i>AT5G13550</i> |
| pGG-PIP68 | <i>SULTR4;2</i> | 712  |                          | Sulfate transporter (Wang <i>et al.</i> , 2022b)                                         | <i>SULFATE TRANSPORTER 4.2</i>                              | <i>AT3G12520</i> |
| pGG-PIP69 | <i>CAD5</i>     | 1134 |                          | Lignin biosynthesis (Kim <i>et al.</i> , 2020)                                           | <i>CINNAMYL ALCOHOL DEHYDROGENASE 5</i>                     | <i>AT4G34230</i> |
| pGG-PIP70 | <i>GPAT5</i>    | 1587 |                          | Suberin biosynthesis (Andersen <i>et al.</i> , 2015)                                     | <i>GLYCEROL-3-PHOSPHATE SN-2-ACYLTRANSFERASE 5</i>          | <i>AT3G11430</i> |
| pGG-PIP71 | <i>MYB15</i>    | 2050 |                          | Lignin biosynthesis in response to pathogens (Kim <i>et al.</i> , 2020)                  | <i>ARABIDOPSIS THALIANA MYB DOMAIN PROTEIN 15</i>           | <i>AT3G23250</i> |
| pGG-PIP72 | <i>PMR4</i>     | 1954 |                          | PAMP-induced defense, callose-deposition (Blümke <i>et al.</i> , 2013)                   | <i>POWDERY MILDEW RESISTANT 4</i>                           | <i>AT4G03550</i> |
| pGG-PIP73 | <i>FH16</i>     | 1158 |                          | Involved in microtubule/actin-network reorganisation (Wang <i>et al.</i> , 2013)         | <i>FORMIN HOMOLOG 16</i>                                    | <i>AT5G07770</i> |
| pGG-PIP74 | <i>NET4A</i>    | 1718 |                          | Modulates the vacuole (Kaiser <i>et al.</i> , 2019)                                      | <i>NETWORKED 4A</i>                                         | <i>AT5G58320</i> |
| pGG-PIP75 | <i>TUB6</i>     | 3349 | 2358 A->G                | Component of microtubules (Liu <i>et al.</i> , 2019)                                     | <i>BETA-6 TUBULIN</i>                                       | <i>AT5G12250</i> |

146 **Table 1: List of the 75 pGG-PIP promoter entry vectors in the set described in this paper.**

147 The pGG-PIP numbers correspond to the red numbers in Fig. 2.

## 148 Using pGG-PIP vectors to create transcriptional reporters for the PEP pathway

149 To test the usefulness of these promoters to map local individual cell responses upon attack by a  
150 microbe, we created transcriptional reporter lines for genes involved in the PEP pathway. We used

151 a nuclear localized tandem of mTurquoise2 (mT2) fluorophores as a reporter, since mT2 has been  
152 shown to be very bright and photostable in plant cells (Goedhart *et al.*, 2012; Long *et al.*, 2018;  
153 Denay *et al.*, 2019). The nuclear localization enhances the brightness even further due to molecular  
154 crowding, and furthermore helps to identify individual cells.

155 We first probed our reporters for the PEP1 and PEP2 peptides (pGG-PIP01 and 02), as well as the  
156 PEPR1 and PEPR2 receptors (pGG-PIP16 and 17), assessing their local responsiveness to  
157 colonization by *Fo5176*. Under control uninfected conditions, *PEP1* was weakly expressed in  
158 inner tissue cells of the root differentiation zone (DZ) (Fig. S1A-D). No expression was detectable  
159 in the root tip, the meristematic or elongation zones (MZ and EZ). *PEP2* was robustly expressed  
160 in the DZ, but in contrast to *PEP1*, its expression was stronger in the outer tissues (Fig. S1G-H).  
161 In addition, it was also expressed in the root tip, around the MZ and early EZ (Fig. S1E-F). *PEPR1*  
162 was generally expressed at a very weak level. In the root tip, starting with the EZ, expression was  
163 limited to the vasculature, while from the young DZ (or root hair zone) onward, expression was  
164 restricted to the outer tissues (Fig. S2A-D). *PEPR2* was expressed only in the DZ, and only in the  
165 vasculature, but expression was much stronger compared to *PEPR1* (Fig. S2E-H). Thus, in  
166 vascular cells, *PEPR1* and *PEPR2* complemented each other under uninfected conditions.  
167 Following colonization of the vasculature by *Fo5176*, *PEP1*, as well as both *PEPRs*, showed a  
168 strong upregulation in the cells adjacent to the colonization site (Fig. 3). Interestingly, this

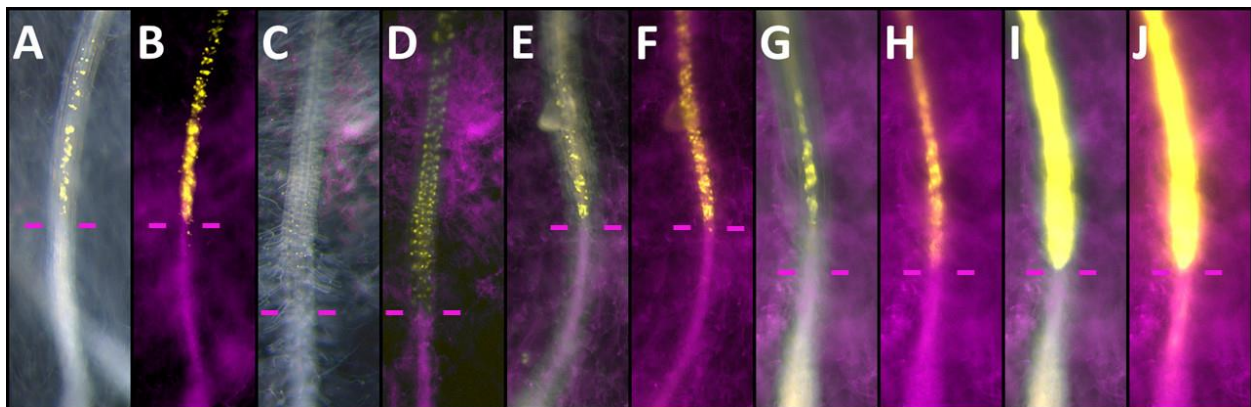

**Figure 3: Local transcriptional responses in *PEP1*, *PEP2*, *PEPR1* and *PEPR2* expression to colonization by *Fo5176***

Bright field and fluorescence (A, C, E, G, I) and fluorescence only (B, D, F, H, J) images of colonized roots expressing the *PEP1* (A, B), *PEP2* (C, D), *PEPR1* (E, F) or *PEPR2* (G-J) reporters. *Fo5176* is shown in magenta, the reporters in yellow. The purple bars indicate the fungal colonization front. All images were recorded with comparable imaging settings, except for G and H, which are the same as I and J, just with reduced exposure time. Expression of the *PEPR2* reporter was so strong (I, J), that we reduced the exposure time to visualize individual cells in G and H.

169 upregulation was limited to the cells of the vasculature, the exact tissue that is targeted and  
170 colonized by *Fo5176*, showing how precisely the plant targets its response. Importantly, the  
171 induction of *PEPR2* was much stronger than the induction of *PEP1* and *PEPR1* (Fig. 3G-J).  
172 Interestingly, *PEP2* also showed an induction next to the colonized tissue, but its expression  
173 appeared to be limited to the outer tissues, the epidermis and cortex, rather than the colonized  
174 vasculature (Fig. 3C, D). The strong induction of the *PEPs* and *PEPRs* remained visible for  
175 roughly 10 to 12 cells, and then tapered out, eventually returning to the expression pattern of the  
176 uninfected control.

177 Since it was shown that the ability of the *PEPs* and *PEPRs* to induce any signaling downstream of  
178 the receptors is strictly dependent on the activity of the cytoplasmic kinase *BIK1*, we also  
179 investigated the responsiveness of a *BIK1* (pGG-PIP22) transcriptional reporter (Liu *et al.*, 2013;  
180 Yamada *et al.*, 2016). Under uninfected control conditions, *BIK1* is expressed in the MZ and DZ,  
181 with stronger expression in the outer tissues, and only weak expression in the vascular tissue of  
182 the MZ, somewhat resembling the expression pattern of *PEP2* (compare Fig. S3A-D and S1E-H).  
183 Following colonization of the root by *Fo5176*, this pattern changed significantly, with *BIK1* now  
184 expressed specifically in the cells immediately bordering the colonized tissue, with a clearly visible  
185 expression maximum in the vasculature (Fig. 4A, B). Hence, the expression maxima of *BIK1*,  
186 *PEP1*, *PEPR1* and *PEPR2* all overlapped in a small group of vascular cells closest to the colonized  
187 tissue. *BIK1* however, also showed expression in the endodermis and cortex, albeit at a much lower  
188 level than in the vasculature, while *PEP1* and *PEPRs* expression were restricted to the vasculature  
189 (Fig. 3 and Fig. 4A, B).

190 One of the downstream outputs of *PEP*-activated *BIK1* is the activation of the NADPH oxidase  
191 *RBOHD* to trigger an apoplastic ROS-burst (Holmes *et al.*, 2018; Jing *et al.*, 2020). We therefore  
192 investigated if *RBOHD* (pGG-PIP31) is also activated in the cells expressing *PEP1*, the *PEPRs*  
193 and *BIK1*. Under uninfected control conditions, *RBOHD* is expressed in all cells and tissues of the  
194 DZ, but not in the root tip (MZ, EZ) (Fig. S3E-H). Upon infection by *Fo5176*, expression is  
195 activated in the cells next to the colonization site, even if they are still part of the EZ, which  
196 normally does not express *RBOHD* (Fig. 4C, D). The pattern we observed very much resembled

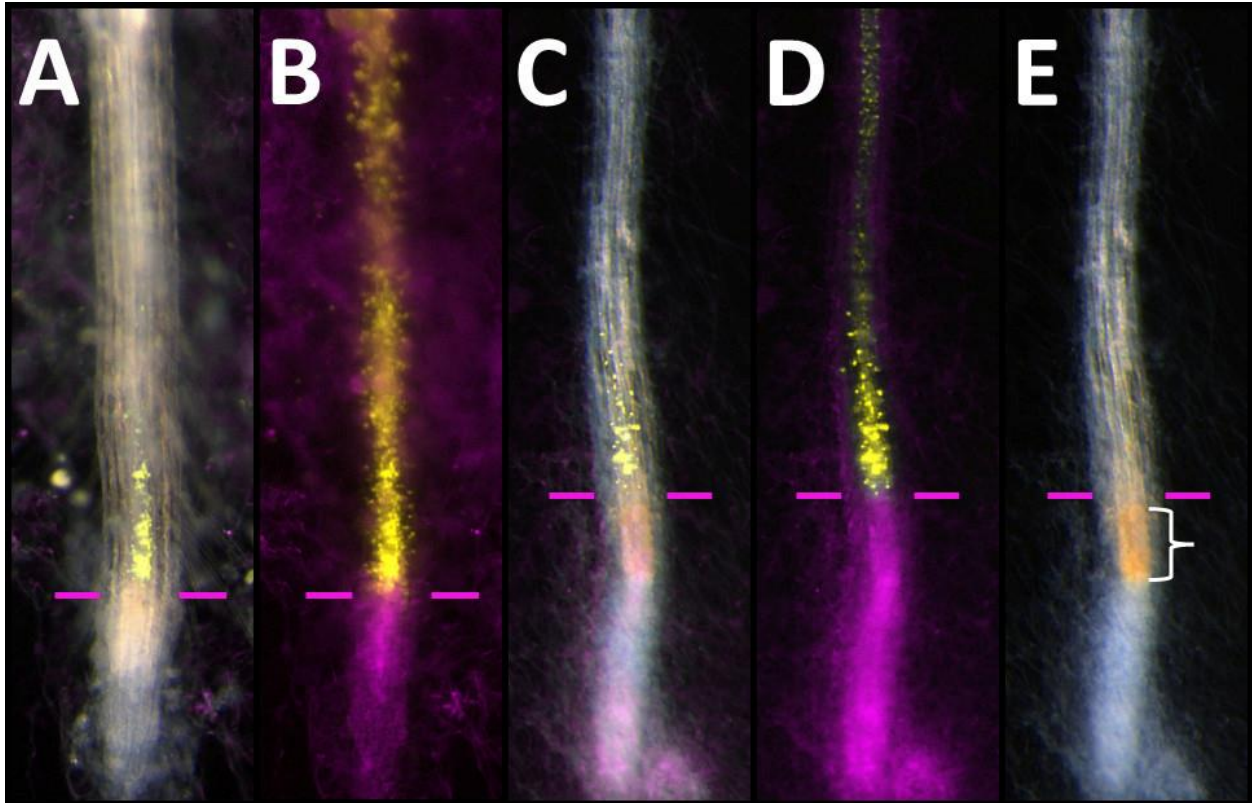

**Figure 4: Transcriptional responses of *BIK1* and *RBOHD* expression to colonization by *Fo5176***

Bright field and fluorescence (A, C), fluorescence only (B, D), or bright field only (E) images of a colonized root expressing the *BIK1* (A, B), or *RBOHD* (C, D, E) reporters. The *Fo5176* is shown in magenta, the reporters in yellow. The purple bars indicate the fungal colonization front. The white bracket in E indicates the area with 'root browning'.

197 the pattern of *BIK1* expression in response to colonization, with a maximum in a small group of  
198 vascular cells next to the colonization site (Fig. 4). However, in contrast to the expression of *BIK1*  
199 and the *PEPs* and *PEPRs*, upregulation of *RBOHD* appeared to be more spatially restricted to the  
200 cells closest to the colonization site. *RBOHD* expression quickly returned to control levels behind  
201 this small group of cells, while the activation of the other markers appeared to taper out more  
202 gradually, across a longer stretch of cells.

203 While imaging the fungal infected reporter lines, we also regularly observed a discoloration of the  
204 root in the colonized tissue (white bracket in Fig. 4E). This has previously been described as 'root  
205 browning', and has been observed in response to infection by *F. oxysporum* or treatment of the  
206 plant with SERINE-RICH ENDOGENOUS PEPTIDES (Tintor *et al.*, 2020; Hou *et al.*, 2021).  
207 While it remains unclear what the exact cause for this discoloration is, redox/oxidative stress  
208 induced by ROS is one possibility. In our assay, the browning does not completely overlap with



209 the expression maximum of *RBOHD*, but as the colonization of the fungus progresses upward  
210 through the vasculature, the *RBOHD* expression also extends along adjacent to the colonization  
211 front. Therefore, the area showing root browning would be the region that last expressed *RBOHD*  
212 at high levels, and thus could have been under redox/oxidative stress, but this requires further  
213 examination.

## 214 **Discussion**

215 In this paper we present a GreenGate-based entry vector set with 75 plant immune system  
216 promoters. In combination with the basic GreenGate kit from Lampropoulos et al. (2013) this is  
217 already sufficient to build simple tools, such as transcriptional reporter lines, that can then be  
218 probed for their responsiveness to a pathogen, elicitor, or other stimulant. Furthermore, owing to  
219 the universal compatibility of these entry vectors with all other GreenGate-based systems, this  
220 vector set can be used to screen for interactors of proteins in their native expression domain using  
221 the proximity ligation kit from Goslin *et al.* (2021), or for tissue-specific gene knockouts by  
222 combining them with the CRISPR-TSKO kit from Decaestecker *et al.* (2019), to name just two  
223 possibilities.

224 As a straightforward proof-of-principle, we used some of the pGG-PIPs to create fluorescent  
225 reporter lines for the PEP pathway and demonstrate how these can be used to gain insights into  
226 *spatial immunity* – the highly localized activation of an immune pathway. Using these lines, we  
227 showed that *PEP1*, and to some degree *PEP2*, were responsive to infection and colonization by  
228 the vascular pathogen *Fo5176*. The danger signal PEP1 was upregulated in a specific group of  
229 vascular cells immediately adjacent to the fungal colonization site, as were the two receptors  
230 *PEPR1* and 2. We thus hypothesize that activation of the PEP pathway is part of the plant's  
231 immune response to infection and colonization by *Fo5176*. Importantly, we could show the highly  
232 targeted activation of this pathway in just a couple of vascular cells immediately adjacent to a  
233 colonization site. Such a local response has rarely been shown *in vivo* and *in planta* before, and is  
234 typically overlooked in large-scale transcriptomic analyses.

235 Since the PEPRs are unlikely to serve as pattern-recognition receptors (PRRs) to sense the  
236 pathogen, it is more likely that the PEPRs are part of a larger complex containing the PRR co-  
237 receptor BAK1, as well as other PRRs, such as MIK2 or FER, since the interaction between BAK1



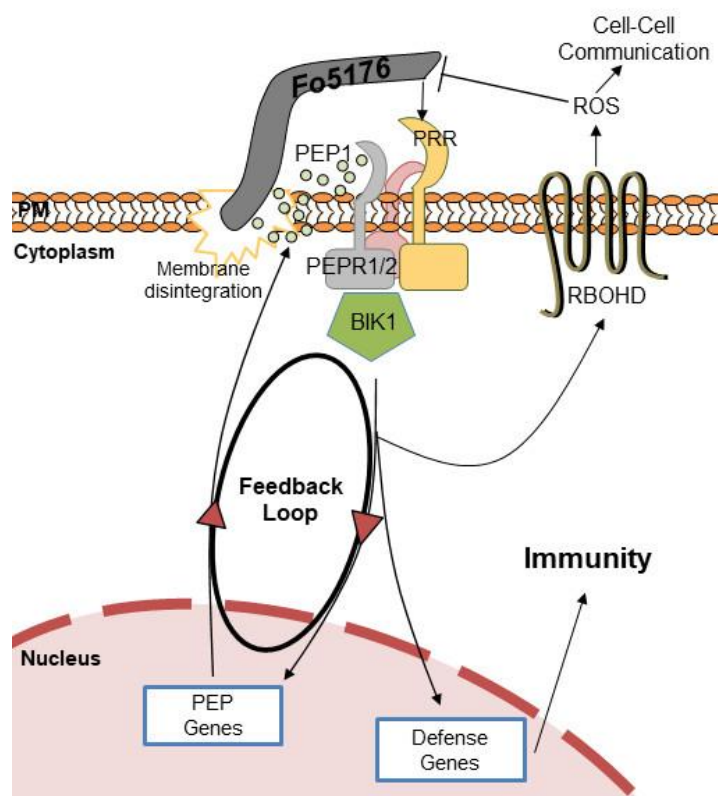

**Figure 5: Model of the PEP pathway in response to Fo5176**

Alkalinization of the apoplast via *Fo5176*-derived alkalinization factors induces interaction of the PEPRs with their PRR co-receptors. Intracellularly the receptors phosphorylate and activate BIK1. BIK1 activates expression of PEP1, thereby amplifying the PEP signal and creating a positive feedback loop. BIK1 also activates other defense genes, possibly via a MAPK cascade, and activates RBOHD to produce an apoplastic ROS-burst, which is damaging to the pathogen, and functions as cell-cell communication signal.

and the PEPRs has been previously shown, and all of these PRRs have been implicated to function in the defense against *Fo5176* (Yamada *et al.*, 2016; Wang *et al.*, 2022a) (Fig. 5). Possibly,

243 these co-receptors are all co-localized in plasma membrane nanodomains to facilitate the rapid  
244 assembly of larger receptor platforms (Somssich *et al.*, 2015; McKenna *et al.*, 2019; Somssich,  
245 2020; Gronnier *et al.*, 2022). Indeed, rather than functioning as a PRR sensing the pathogen  
246 directly, work from a recent publication suggests that the PEPRs act as extracellular pH sensors  
247 (Liu *et al.*, 2022). Alkalinization of the apoplast is a hallmark of activated immunity, and Liu *et*  
248 *al.*, (2022) show that the PEPRs specifically interact with their co-receptor BAK1 under alkaline  
249 conditions, while they only show a weak affinity for interaction under acidic conditions (Felix *et*  
250 *al.*, 1993; Liu *et al.*, 2022). Interestingly, *F. oxysporum* uses functional homologs of plant RAPID  
251 ALKALINIZATION FACTORS to induce alkalinization of the apoplast, as this also stimulates  
252 infectious growth of the fungus (Masachis *et al.*, 2016; Wang *et al.*, 2022a). Thus, the PEPRs  
253 pathway may act as pH sensors to counteract this action by the fungus, improving the plant's  
254 defense under these alkaline conditions. Extracellular binding of the PEPs to their receptors  
255 generally leads to the activation of the PEPRs intracellular kinase domain and trans-  
256 phosphorylation of the interacting cytoplasmic kinase BIK1 (Liu *et al.*, 2013). Indeed, we could  
257 show that our *BIK1* reporter is also activated in the same pattern as the *PEP1* and the *PEPR*  
258 reporters. BIK1 activation then facilitates downstream intracellular signaling (Yamada *et al.*,

259 2016). These downstream signaling events eventually result in the transcriptional activation of  
260 defense genes, but also auto-activation of the *PEP* genes (Fig. 5). Since the PEPs do not have an  
261 identifiable secretion signal that would direct them into the secretory pathway, it is assumed that  
262 they are released into the apoplast indirectly when a pathogen breaches the plasma membrane and  
263 causes local membrane disintegration (Fig. 5) (Yamaguchi and Huffaker, 2011; Yamada *et al.*,  
264 2016). Once in the apoplast, they are then perceived by the PEPRs, creating a positive feedback-  
265 loop of PEP-signaling and an auto-amplification of the plant's defense response (Fig. 5). A second  
266 intracellular pathway activated via BIK1 leads to activation of the NADPH oxidase RBOHD (Fig.  
267 5) (Kadota *et al.*, 2014; Holmes *et al.*, 2018; Jing *et al.*, 2020). This pathway was proposed to be  
268 primarily driven by PEP1 and the PEPR2 (Jing *et al.*, 2020) and indeed, *PEP1* and *PEPR2* are also  
269 the two reporters showing the strongest response to colonization by *Fo5176*, while *PEP2* was  
270 primarily upregulated in the cells around the vasculature. *PEPR1* was also activated in the same  
271 pattern as *PEP1*, *PEPR2*, and *BIK1*, but at a much lower level compared to *PEPR2*. Further, we  
272 could also confirm that *RBOHD* expression is activated in these same cells, indicating that this  
273 *BIK1-RBOHD*-dependent pathway for ROS-release is also potentially involved in the defense  
274 against *Fo5176* (Fig. 5). The activation of RBOHD, and the resulting ROS-burst, would aid in the  
275 plant's defense against *Fo5176*, with ROS being directly harmful to the pathogen. Additionally,  
276 ROS is known to also function as a signal in cell-cell communication to prime the surrounding  
277 tissue for impending attack (Waszczak *et al.*, 2018). We believe that the local 'root browning' that  
278 we observed in the infected roots is likely the result of this apoplastic ROS-burst.

279 A role for the PEP-pathway in the defense against *F. oxysporum* has previously been hypothesized  
280 on the basis of transcriptomic data showing up- or downregulation of some of the components in  
281 response to infection (Fallath *et al.*, 2017; Guo *et al.*, 2021; Wang *et al.*, 2022a). By investigating  
282 the responsiveness of our transcriptional reporters for PEP1 and 2, as well as PEPR1 and 2, we  
283 added spatial resolution to the available transcriptomic data. We could show that PEP1 and the  
284 PEPRs act in a clearly defined group of vascular cells immediately next to the fungal colonization  
285 site, and this localized response overlaps with the activation of downstream signaling factors and  
286 a local ROS-burst. *PEP2* was also induced in response to colonization, but it appeared to be  
287 upregulated in the outer tissues, not the infected vasculature. While this may indicate a role for  
288 *PEP2* in priming these neighboring tissues, the fact that neither of the two *PEPRs* were expressed  
289 there, makes it unclear how *PEP2* would be perceived in these cells. Importantly, when Fallath *et*

290 *al.* (2017) investigated the transcriptional response of *med* mutants to infection by *Fo5176*, they  
291 also only noted a deregulation of *PEP1* in these mutants, but not *PEP2*, indicating that *PEP1* is  
292 indeed the major PEP signal acting in response to colonization by *Fo5176*.

293 Finally, we believe that the pGG-PIP plant immune promoter resource introduced in this article  
294 will be valuable and helpful to the community for various research approaches. We will make the  
295 75-plasmid collection available via AddGene for quick and simple distribution to the community.  
296 We aim to provide further detailed ‘spatial immunity’ information by using these pGG-PIPs in our  
297 future work.

## 298 **Material & Methods**

### 299 **Cloning of the pGG-PIPs and transcriptional reporter constructs**

300 The pGG-PIP entry vectors are based on the pGGA000 vector from the original GreenGate kit  
301 (Lampropoulos *et al.*, 2013). The different promoters were amplified from total cellular *A. thaliana*  
302 (natural accession Columbia) DNA, extracted from rosette leaves with the Qiagen DNeasy Plant  
303 Kit, and using the primers in supplementary table 1. For error-free amplification, the Phusion high-  
304 fidelity DNA polymerase with proofreading (New England Biolabs) was used. The fragments were  
305 then transferred into pGGA000 in a Golden Gate assembly reaction using the NEBridge Golden  
306 Gate Assembly Kit (BsaI-HF v2) (New England Biolabs). To clone the transcriptional reporter  
307 lines, we used the destination vector pGGZ003, as well as the donor vectors pGGD007 (*linker-*  
308 *NLS* (Nuclear Localization Signal)), pGGE009 (*UBQ10* terminator), and pGGF005  
309 (*pUBQ10::HygR:tOCS*) from the original GreenGate kit from Lampropoulos *et al.* (2013). pGGB-  
310 mT2 (*mTurquoise2*) and pGGC-mT2 (*mTurquoise2*) were created by cloning the *mT2* coding  
311 sequence from an AddGene-derived template into pGGB000 and pGGC000 from the original  
312 GreenGate kit (Goedhart *et al.*, 2012; Lampropoulos *et al.*, 2013). In combination with our pGG-  
313 PIPs, this yielded the *pPIP::mT2-mT2-NLS:tUBQ10:pUBQ10::HygR:tOCS* reporters.

### 314 **Plant growth and transformation**

315 *A. thaliana* Columbia plants (Somssich, 2018) were grown at 16-hour light conditions, with 21 °C  
316 during the light hours, and 18 °C during the dark hours. Light intensity was 120 mmol m<sup>-2</sup>s<sup>-1</sup>, and  
317 humidity was 70%. Plant transformation was done via the *Agrobacterium tumefaciens* host strain  
318 GV3101 *pMP90 pSoup* carrying one of the plasmids in table 1 using the floral dip method (Holsters  
319 *et al.*, 1980; Koncz and Schell, 1986; Clough and Bent, 1998; Hellens *et al.*, 2000; Somssich,

2019). Individual resistant bacteria colonies were selected after two days of growth at 28° C on  
YT plates (Miller, 1972) supplemented with 50 µg/ml rifampicin, 25 µg/ml gentamycin, 5 µg/ml  
tetracyclin, and 100 µg/ml spectinomycin, then grown overnight in 250 ml of liquid 2×YT medium  
with 50 µg/ml rifampicin, 25 µg/ml gentamycin, and 100 µg/ml spectinomycin, shaking at 200  
rpm. Cells were harvested by centrifugation at 3200 g for 20 min, and resuspended in 300 ml of a  
5% sucrose solution with 0.08% Silwet L-77. Plants were then dipped into the solution for  
approximately 30 seconds with gentle agitation and laid out into a tray covered with cling wrap  
overnight to maintain humidity. The next day they were returned to upright, and the procedure was  
repeated after seven days. Once the siliques had ripened, the seeds were harvested and dried for at  
least two weeks. For the selection of positive transformants, seeds were surface-sterilized using  
75% ethanol with 0.1% Triton X-100 on a rotating incubator for at least two hours, after which the  
seeds were decanted onto filter paper and the ethanol left to evaporate. Once the seeds were dry,  
they were sprinkled onto a plate of half-strength basal Murashige & Skoog (MS) medium with  
vitamins and 30 µg/ml hygromycin B, wrapped in aluminum foil, and stratified at 4 °C for three  
days (Murashige and Skoog, 1962). They were then placed into a growth cabinet for 10 to 14 days,  
after which healthy looking seedlings were transferred to half-strength MS plates without the  
hygromycin, and grown for another two weeks, at which stage they were transferred to soil.

### 337 **Fungal growth and transformation**

338 The *F. oxysporum* f. sp. *conglutinans* strain 5176 was collected in 1971 from white cabbage  
339 (*Brassica oleracea* var. *capitata* (L.)) in Australia (Wang *et al.*, 2022a). It has since been  
340 maintained by the Brisbane Pathology (BRIP) Plant Pathology Herbarium in Queensland,  
341 Australia under the accession number BRIP 5176 a. It was first used as a model pathogen for *A.*  
342 *thaliana* by (Campbell *et al.*, 2003). To generate a *Fo5176* line expressing cytoplasmic tdTomato  
343 (tdT), an expression clone was generated by cloning the *tdT* coding sequence (amplified from an  
344 AddGene-derived plasmid (Shaner *et al.*, 2004)) into the *Bg*III cloning site of plasmid pLAU2  
345 using Gibson assembly (Idnurm *et al.*, 2017). This places the gene under the control of a  
346 constitutive promoter from the *actin* gene of ascomycete *Leptosphaeria maculans*. After  
347 replication in *E. coli*, this plasmid pMAI32 was electroporated into *A. tumefaciens* strain EHA105  
348 with selection on LB medium with kanamycin (50 µg/ml). *Fo5176* was routinely cultured on  
349 potato dextrose agar (PDA) plates. To generate spores for transformation, five plugs of about 5  
350 mm diameter were inoculated into 50 ml half strength potato dextrose broth and cultured at 150

351 rpm for five days at room temperature, then filtered through miracloth, centrifuged at 3000 g for  
352 5 min, and resuspended in sterile H<sub>2</sub>O. The spores were then transformed with the *A. tumefaciens*  
353 strain that had been cultured overnight in LB broth with kanamycin, using standard methods  
354 (Idnurm *et al.*, 2017). That is, fungal spores and bacteria were mixed on induction medium plates  
355 and cocultured for three days. Selection for transformants used an overlay of PDA supplemented  
356 with hygromycin and cefotaxime (50 µg/ml and 100 µg/ml, respectively). Transformants that grew  
357 through the overlaid medium, were subcultured onto PDA containing hygromycin and cefotaxime  
358 and allowed to produce conidia, which were separated with a metal loop to generate strains derived  
359 from a single conidium.

### 360 **Plant-fungus co-cultivation and infection**

361 To obtain fungal spores, *Fo5176* was grown for at least seven days on PDA plates at room  
362 temperature, at which time five pieces of roughly 1 mm<sup>2</sup> size were cut from the plate and dropped  
363 into a flask containing 50 ml yeast nitrogen base (YNB) medium with 1% sucrose. The liquid  
364 cultures were incubated for four days at room temperature with shaking at 120 rpm. The solution  
365 was then filtered through miracloth, the spores harvested by centrifugation at 3000 rcf for 10 min  
366 and resuspended in 25 ml sterile MilliQ water. For the co-cultivation of plant and fungus, *A.*  
367 *thaliana* seedlings were grown on a vertical petri dish containing half-strength basal MS medium  
368 with vitamins for 11 days and then transferred to a horizontal petri dish with a 2-3 cm strip of half-  
369 strength basal MS medium with vitamins at the top end, while the rest of the plate was filled  
370 roughly 2-3 mm high with liquid quarter-strength basal MS medium with vitamins (this is a setup  
371 with slight modifications as described in (Tintor *et al.*, 2020)). The seedlings were placed onto the  
372 thin MS medium strip at the top end, with the root in the liquid medium. Fungal spores were then  
373 added to the liquid medium. The plates were covered with aluminum foil up until the leaves of the  
374 plant, and then placed into a growth chamber.

### 375 **Microscopy**

376 We imaged the infection and the progression of colonization on a Leica M205 FA  
377 stereomicroscope. Infection could usually be observed on day three after spored addition, and at  
378 day 5 there was robust colonization. We usually imaged daily from day 3 to 11 dpi. For the  
379 fluorescence coming from the plant 2xmT2 reporters, we used the Leica ET CFP (ET436/20x  
380 ET480/40m) filter, and for the fungal tdT reporter the Leica ET mCHER (ET560/40x ET630/75m)



381 filter. We use 80× magnification for the images used in this paper. The settings for the imaging  
382 (illumination strength, exposure time, gain, etc.) were kept constant for all imaging sessions, to  
383 allow for at least semi-quantitative imaging, and to make the images at least relatively comparable.  
384 The images were recorded using the Leica Application Suite software, and processed using Fiji Is  
385 Just ImageJ (FIJI) and the GNU Image Manipulation Program (GIMP) (Schindelin *et al.*, 2012).

### 386 **Data availability**

387 We have donated the pGG-PIP vector collection to AddGene (Deposit-ID: 82532, Catalog-#:  
388 196739-196813).

### 389 **Acknowledgements**

390 This work was funded by the Australian Research Council (grant no. DE200101560) and was  
391 further supported by a seed grant from the Melbourne University Botany Foundation. LW was  
392 supported by the China Scholarship Council. H-WC was supported by a Graduate Research  
393 Scholarship from the University of Melbourne. Imaging was done on instruments maintained by  
394 the Biological Optical Microscopy Platform (BOMP) and the BioSciences Microscopy Unit at the  
395 University of Melbourne. The authors would like to thank Dr. Imre E. Somssich for critical reading  
396 of the manuscript.

### 397 **References**

- 398 **Acevedo-Garcia J, Gruner K, Reinstädler A, *et al.*** 2017. The powdery mildew-resistant  
399 Arabidopsis mlo2 mlo6 mlo12 triple mutant displays altered infection phenotypes with diverse  
400 types of phytopathogens. *Scientific reports* **7**, 9319.
- 401 **Andersen TG, Barberon M, Geldner N.** 2015. Suberization-the second life of an endodermal  
402 cell. *Current Opinion in Plant Biology* **28**, 9–15.
- 403 **Bird JE, Marles-Wright J, Giachino A.** 2022. A User’s Guide to Golden Gate Cloning  
404 Methods and Standards. *ACS Synthetic Biology*.
- 405 **Birkenbihl RP, Kracher B, Ross A, Kramer K, Finkemeier I, Somssich IE.** 2018. Principles  
406 and characteristics of the Arabidopsis WRKY regulatory network during early MAMP-triggered  
407 immunity. *The Plant Journal*.

- 408 **Birkenbihl RP, Kracher B, Somssich IE.** 2017*a*. Induced Genome-Wide Binding of Three  
409 Arabidopsis WRKY Transcription Factors during Early MAMP-Triggered Immunity. *The Plant*  
410 *cell* **29**, 20–38.
- 411 **Birkenbihl RP, Liu S, Somssich IE.** 2017*b*. Transcriptional events defining plant immune  
412 responses. *Current Opinion in Plant Biology* **38**, 1–9.
- 413 **Blümke A, Somerville SC, Voigt CA.** 2013. Transient expression of the Arabidopsis thaliana  
414 callose synthase PMR4 increases penetration resistance to powdery mildew in barley. *Advances*  
415 *in Bioscience and Biotechnology* **04**, 810–813.
- 416 **Cai Q, Qiao L, Wang M, He B, Lin F, Palmquist J, Huang S-D, Jin H.** 2018. Plants send  
417 small RNAs in extracellular vesicles to fungal pathogen to silence virulence genes. *Science* **360**,  
418 1126–1129.
- 419 **Calabria J, Wang L, Rast-Somssich MI, Chen H-W, Watt M, Persson S, Idnurm A,**  
420 **Somssich M.** 2022. Spatially distinct phytohormone responses of individual Arabidopsis thaliana  
421 root cells to infection and colonization by *Fusarium oxysporum*. *bioRxiv*, 521292.
- 422 **Campbell EJ, Schenk PM, Kazan K, Penninckx IAMA, Anderson JP, Maclean DJ,**  
423 **Cammue BPA, Ebert PR, Manners JM.** 2003. Pathogen-responsive expression of a putative  
424 ATP-binding cassette transporter gene conferring resistance to the diterpenoid sclareol is  
425 regulated by multiple defense signaling pathways in Arabidopsis. *Plant physiology* **133**, 1272–  
426 84.
- 427 **Cao Y, Liang Y, Tanaka K, Nguyen CT, Jedrzejczak RP, Joachimiak A, Stacey G.** 2014.  
428 The kinase LYK5 is a major chitin receptor in Arabidopsis and forms a chitin-induced complex  
429 with related kinase CERK1. *eLife* **3**, 1–19.
- 430 **Cho H, Lee J, Oh E.** 2022. Leucine-Rich Repeat Receptor-Like Proteins in Plants: Structure,  
431 Function, and Signaling. *Journal of Plant Biology*.
- 432 **Chuberre C, Plancot B, Driouich A, Moore JP, Bardor M, Gügi B, Vicré M.** 2018. Plant  
433 Immunity Is Compartmentalized and Specialized in Roots. *Frontiers in Plant Science* **9**, 1–13.
- 434 **Clough SJ, Bent AF.** 1998. Floral dip: a simplified method for *Agrobacterium*-mediated  
435 transformation of Arabidopsis thaliana. *The Plant Journal* **16**, 735–43.

- 436 **Couto D, Zipfel C.** 2016. Regulation of pattern recognition receptor signalling in plants. *Nature*  
437 *reviews. Immunology* **16**, 537–552.
- 438 **Decaestecker W, Buono RA, Pfeiffer ML, Vangheluwe N, Jourquin J, Karimi M, Van**  
439 **Isterdael G, Beeckman T, Nowack MK, Jacobs TB.** 2019. CRISPR-TSKO: A Technique for  
440 Efficient Mutagenesis in Specific Cell Types, Tissues, or Organs in Arabidopsis. *The Plant Cell*  
441 **31**, 2868–2887.
- 442 **Denay G, Blümke P, Hänsch S, Weidtkamp-Peters S, Simon R.** 2019. Over the rainbow: A  
443 practical guide for fluorescent protein selection in plant FRET experiments. *Plant Direct* **3**,  
444 e00189.
- 445 **Dogra V, Singh RM, Li M, Li M, Singh S, Kim C.** 2022. EXECUTER2 modulates the  
446 EXECUTER1 signalosome through its singlet oxygen-dependent oxidation. *Molecular Plant* **15**,  
447 438–453.
- 448 **Duan Z, Liu W, Li K, Duan W, Zhu S, Xing J, Chen T, Luo X.** 2022. Regulation of immune  
449 complex formation and signalling by FERONIA, a busy goddess in plant–microbe interactions.  
450 *Molecular Plant Pathology*, 1–6.
- 451 **Engler C, Gruetzner R, Kandzia R, Marillonnet S.** 2009. Golden Gate Shuffling: A One-Pot  
452 DNA Shuffling Method Based on Type II Restriction Enzymes (J Peccoud, Ed.). *PLOS ONE* **4**,  
453 e5553.
- 454 **Engler C, Kandzia R, Marillonnet S.** 2008. A One Pot, One Step, Precision Cloning Method  
455 with High Throughput Capability (HA El-Shemy, Ed.). *PLOS ONE* **3**, e3647.
- 456 **Fallath T, Kidd BN, Stiller J, Davoine C, Björklund S, Manners JM, Kazan K, Schenk PM.**  
457 2017. MEDIATOR18 and MEDIATOR20 confer susceptibility to *Fusarium oxysporum* in  
458 *Arabidopsis thaliana*. *PLOS ONE* **12**, e0176022.
- 459 **Felix G, Regenass M, Boller T.** 1993. Specific perception of subnanomolar concentrations of  
460 chitin fragments by tomato cells: induction of extracellular alkalization, changes in protein  
461 phosphorylation, and establishment of a refractory state. *The Plant Journal* **4**, 307–316.
- 462 **Gao X, He P.** 2013. Nuclear dynamics of Arabidopsis calcium-dependent protein kinases in  
463 effector-triggered immunity. *Plant signaling & behavior* **8**, e23868.

- 464 **Goedhart J, von Stetten D, Noirclerc-Savoie M, Lelimosin M, Joosen L, Hink MA, van**  
465 **Weeren L, Gadella Jr. TWJ, Royant A.** 2012. Structure-guided evolution of cyan fluorescent  
466 proteins towards a quantum yield of 93%. *Nature communications* **3**, 751.
- 467 **Gonçalves Dias M, Soleimani F, Monaghan J.** 2022. Activation and turnover of the plant  
468 immune signaling kinase BIK1: a fine balance. *Essays in Biochemistry*, 1–12.
- 469 **Goslin K, Finocchio A, Wellmer F.** 2021. A Golden Gate-based Plasmid Library for the Rapid  
470 Assembly of Biotin Ligase Constructs for Proximity Labelling. *bioRxiv*, 464533.
- 471 **Greenwood JR, Williams SJ.** 2022. Guarding the central regulator of extracellular perception in  
472 plants – A job for two. *Cell Host & Microbe* **30**, 1657–1659.
- 473 **Gronnier J, Franck CM, Stegmann M, et al.** 2022. Regulation of immune receptor kinase  
474 plasma membrane nanoscale organization by a plant peptide hormone and its receptors. *eLife* **11**,  
475 212233.
- 476 **Guo L, Yu H, Wang B, et al.** 2021. Metatranscriptomic Comparison of Endophytic and  
477 Pathogenic *Fusarium* –*Arabidopsis* Interactions Reveals Plant Transcriptional Plasticity.  
478 *Molecular Plant-Microbe Interactions* **34**, 1071–1083.
- 479 **Hartley JL, Temple GF, Brasch MA.** 2000. DNA Cloning Using In Vitro Site-Specific  
480 Recombination. *Genome Research* **10**, 1788–1795.
- 481 **Hellens RP, Edwards EA, Leyland NR, Bean S, Mullineaux PM.** 2000. pGreen: a versatile  
482 and flexible binary Ti vector for *Agrobacterium*-mediated plant transformation. *Plant molecular*  
483 *biology* **42**, 819–32.
- 484 **Holmes DR, Grubb LE, Monaghan J.** 2018. The jasmonate receptor COI1 is required for  
485 AtPep1-induced immune responses in *Arabidopsis thaliana*. *BMC Research Notes* **11**, 555.
- 486 **Holsters M, Silva B, van Vliet F, et al.** 1980. The functional organization of the nopaline *A.*  
487 *tumefaciens* plasmid pTiC58. *Plasmid* **3**, 212–230.
- 488 **Hou S, Liu D, Huang S, et al.** 2021. The *Arabidopsis* MIK2 receptor elicits immunity by  
489 sensing a conserved signature from phyto cytokines and microbes. *Nature Communications* **12**,  
490 5494.

- 491 **Huerta AI, Sancho-Andrés G, Montesinos JC, et al.** 2023. The WAK-like protein RFO1 acts  
492 as a sensor of the pectin methylation status in Arabidopsis cell walls to modulate root growth and  
493 defense. *Molecular Plant* **2**, 33–47.
- 494 **Idnurm A, Urquhart AS, Vummadi DR, Chang S, Van de Wouw AP, López-Ruiz FJ.** 2017.  
495 Spontaneous and CRISPR/Cas9-induced mutation of the osmosensor histidine kinase of the  
496 canola pathogen *Leptosphaeria maculans*. *Fungal Biology and Biotechnology* **4**, 12.
- 497 **Jia A, Huang S, Song W, et al.** 2022. TIR-catalyzed ADP-ribosylation reactions produce  
498 signaling molecules for plant immunity. *Science* **377**.
- 499 **Jin T, Wu H, Deng Z, Cai T, Li J, Liu Z, Waterhouse PM, White RG, Liang D.** 2022.  
500 Control of root-to-shoot long-distance flow by a key ROS-regulating factor in Arabidopsis.  
501 *Plant, Cell & Environment*, 0–2.
- 502 **Jing Y, Shen N, Zheng X, Fu A, Zhao F, Lan W, Luan S.** 2020. Danger-Associated Peptide  
503 Regulates Root Immune Responses and Root Growth by Affecting ROS Formation in  
504 Arabidopsis. *International Journal of Molecular Sciences* **21**, 4590.
- 505 **Joglekar S, Suliman M, Bartsch M, Halder V, Maintz J, Bautor J, Zeier J, Parker JE,  
506 Kombrink E.** 2018. Chemical Activation of EDS1/PAD4 Signaling Leading to Pathogen  
507 Resistance in Arabidopsis. *Plant & Cell Physiology* **59**, 1592–1607.
- 508 **Journot-Catalino N, Somssich IE, Roby D, Kroj T.** 2006. The transcription factors WRKY11  
509 and WRKY17 act as negative regulators of basal resistance in Arabidopsis thaliana. *The Plant*  
510 *cell* **18**, 3289–3302.
- 511 **Kadota Y, Sklenar J, Derbyshire P, et al.** 2014. Direct regulation of the NADPH oxidase  
512 RBOHD by the PRR-associated kinase BIK1 during plant immunity. *Molecular cell* **54**, 43–55.
- 513 **Kaiser S, Eisa A, Kleine-Vehn J, Scheuring D.** 2019. NET4 Modulates the Compactness of  
514 Vacuoles in Arabidopsis thaliana. *International Journal of Molecular Sciences* **20**, 4752.
- 515 **Kim SH, Lam PY, Lee M-H, Jeon HS, Tobimatsu Y, Park OK.** 2020. The Arabidopsis R2R3  
516 MYB Transcription Factor MYB15 Is a Key Regulator of Lignin Biosynthesis in Effector-  
517 Triggered Immunity. *Frontiers in Plant Science* **11**, 1–10.



- 518 **Koncz C, Schell J.** 1986. The promoter of TL-DNA gene 5 controls the tissue-specific  
519 expression of chimaeric genes carried by a novel type of Agrobacterium binary vector.  
520 *Molecular & General Genetics* **204**, 383–396.
- 521 **Kümpers BMC, Han J, Vaughan-Hirsch J, et al.** 2022. Dual expression and anatomy lines  
522 allow simultaneous visualization of gene expression and anatomy. *Plant Physiology* **188**, 56–69.
- 523 **Lampropoulos A, Sutikovic Z, Wenzl C, Maegele I, Lohmann JU, Forner J.** 2013.  
524 GreenGate - a novel, versatile, and efficient cloning system for plant transgenesis. *PLOS ONE* **8**,  
525 e83043.
- 526 **Lee D-K, Parrott DL, Adhikari E, Fraser N, Sieburth LE.** 2016. The Mobile bypass Signal  
527 Arrests Shoot Growth by Disrupting Shoot Apical Meristem Maintenance, Cytokinin Signaling,  
528 and WUS Transcription Factor Expression. *Plant Physiology* **171**, 2178–2190.
- 529 **Liu J, Liu B, Chen S, et al.** 2018. A Tyrosine Phosphorylation Cycle Regulates Fungal  
530 Activation of a Plant Receptor Ser/Thr Kinase. *Cell Host & Microbe* **23**, 241-253.e6.
- 531 **Liu L, Song W, Huang S, et al.** 2022. Extracellular pH sensing by plant cell-surface peptide-  
532 receptor complexes. *Cell*, 1–15.
- 533 **Liu W, Wang C, Wang G, Ma Y, Tian J, Yu Y, Dong L, Kong Z.** 2019. Towards a better  
534 recording of microtubule cytoskeletal spatial organization and dynamics in plant cells. *Journal of*  
535 *Integrative Plant Biology* **61**, 388–393.
- 536 **Liu Z, Wu Y, Yang F, Zhang Y, Chen S, Xie Q, Tian X, Zhou J-M.** 2013. BIK1 interacts  
537 with PEPRs to mediate ethylene-induced immunity. *Proceedings of the National Academy of*  
538 *Sciences of the United States of America* **110**, 6205–6210.
- 539 **Long Y, Stahl Y, Weidtkamp-Peters S, Smet W, Du Y, Gadella Jr. TWJ, Goedhart J,**  
540 **Scheres B, Blilou I.** 2018. Optimizing FRET-FLIM Labeling Conditions to Detect Nuclear  
541 Protein Interactions at Native Expression Levels in Living Arabidopsis Roots. *Frontiers in Plant*  
542 *Science* **9**, 1–13.
- 543 **Masachis S, Segorbe D, Turrà D, et al.** 2016. A fungal pathogen secretes plant alkalizing  
544 peptides to increase infection. *Nature Microbiology* **1**, 16043.

- 545 **McKenna JF, Rolfe DJ, Webb SED, Tolmie AF, Botchway SW, Martin-Fernandez ML,**  
546 **Hawes C, Runions J.** 2019. The cell wall regulates dynamics and size of plasma-membrane  
547 nanodomains in Arabidopsis. *Proceedings of the National Academy of Sciences of the United*  
548 *States of America*, 201819077.
- 549 **Meng F, Ellis T.** 2020. The second decade of synthetic biology: 2010–2020. *Nature*  
550 *Communications* **11**, 5174.
- 551 **Miller JH.** 1972. *Formulas and recipes. Experiments in molecular genetics.* Cold Spring Harbor,  
552 New York: Cold Spring Harbor Laboratory, 433.
- 553 **Morales J, Kadota Y, Zipfel C, Molina A, Torres MÁ.** 2016. The Arabidopsis NADPH  
554 oxidases RbohD and RbohF display differential expression patterns and contributions during  
555 plant immunity. *Journal of experimental botany* **67**, 1663–76.
- 556 **Murashige T, Skoog F.** 1962. A Revised Medium for Rapid Growth and Bio Assays with  
557 Tobacco Tissue Cultures. *Physiologia Plantarum* **15**, 473–497.
- 558 **Ngou BPM, Ahn H, Ding P, Jones JDG.** 2021. Mutual potentiation of plant immunity by cell-  
559 surface and intracellular receptors. *Nature* **592**, 110–115.
- 560 **Patil M, Senthil-Kumar M.** 2020. *Role of Plant Kinases in Combined Stress. Protein Kinases*  
561 *and Stress Signaling in Plants.* Wiley, 445–458.
- 562 **Petutschnig E, Anders J, Stolze M, et al.** 2022. EXTRA LARGE G-PROTEIN2 mediates cell  
563 death and hyperimmunity in the chitin elicitor receptor kinase 1-4 mutant. *Plant Physiology* **5**.
- 564 **Rhodes J, Yang H, Moussu S, Boutrot F, Santiago J, Zipfel C.** 2021. Perception of a  
565 divergent family of phyto cytokines by the Arabidopsis receptor kinase MIK2. *Nature*  
566 *Communications* **12**, 705.
- 567 **Saijo Y, Loo EP, Yasuda S.** 2018. Pattern recognition receptors and signaling in plant-microbe  
568 interactions. *The Plant Journal* **93**, 592–613.
- 569 **Salguero-Linares J, Serrano I, Ruiz-Solani N, Salas-Gómez M, Phukan UJ, González VM,**  
570 **Bernardo-Faura M, Valls M, Rengel D, Coll NS.** 2022. Robust transcriptional indicators of  
571 immune cell death revealed by spatiotemporal transcriptome analyses. *Molecular Plant* **15**,

- 572 1059–1075.
- 573 **Schindelin J, Arganda-Carreras I, Frise E, et al.** 2012. Fiji: an open-source platform for  
574 biological-image analysis. *Nature methods* **9**, 676–82.
- 575 **Schürholz A-K, Lopez-Salmeron V, Li Z, et al.** 2018. A Comprehensive Toolkit for Inducible,  
576 Cell Type-Specific Gene Expression in Arabidopsis. *Plant Physiology*, pp.00463.2018.
- 577 **Shaner NC, Campbell RE, Steinbach PA, Giepmans BNG, Palmer AE, Tsien RY.** 2004.  
578 Improved monomeric red, orange and yellow fluorescent proteins derived from *Discosoma* sp.  
579 red fluorescent protein. *Nature biotechnology* **22**, 1567–72.
- 580 **Somssich M.** 2018. A short history of *Arabidopsis thaliana* (L.) Heynh. Columbia-0. *PeerJ*  
581 Preprints **e26931v3**, 1–7.
- 582 **Somssich M.** 2019. A short history of plant transformation. *PeerJ Preprints*, 1–28.
- 583 **Somssich M.** 2020. FERONIA is the new BAK1, and membrane nanodomains are the new thing  
584 - but the flg22/FLS2/BAK1 complex continues to serve as a platform for new discoveries.  
585 preLights, 23746.
- 586 **Somssich M.** 2022. The Dawn of Plant Molecular Biology: How Three Key Methodologies  
587 Paved the Way. *Current Protocols* **2**, 1–19.
- 588 **Somssich M, Ma Q, Weidtkamp-Peters S, Stahl Y, Felekyan S, Bleckmann A, Seidel CAM,**  
589 **Simon R.** 2015. Real-time dynamics of peptide ligand-dependent receptor complex formation in  
590 planta. *Science Signaling* **8**, 1–9.
- 591 **Stegmann M, Monaghan J, Smakowska-Luzan E, Rovenich H, Lehner A, Holton NJ,**  
592 **Belkhadir Y, Zipfel C.** 2017. The receptor kinase FER is a RALF-regulated scaffold controlling  
593 plant immune signaling. *Science* **355**, 287–289.
- 594 **Sun T, Zhang Y.** 2021. Short- and long-distance signaling in plant defense. *The Plant Journal*  
595 **105**, 505–517.
- 596 **Tanaka T, Ikeda A, Shiojiri K, et al.** 2018. Identification of a Hexenal Reductase That  
597 Modulates the Composition of Green Leaf Volatiles. *Plant Physiology* **178**, 552–564.
- 598 **Tintor N, Paauw M, Rep M, Takken FLW.** 2020. The root-invading pathogen *Fusarium*

- 599 oxysporum targets pattern-triggered immunity using both cytoplasmic and apoplastic effectors.  
600 *New Phytologist* **227**, 1479–1492.
- 601 **Tseng Y, Scholz SS, Fliegmann J, Krüger T, Gandhi A, Furch ACU, Kniemeyer O,**  
602 **Brakhage AA, Oelmüller R.** 2022. CORK1, A LRR-Malectin Receptor Kinase, Is Required for  
603 Cellooligomer-Induced Responses in *Arabidopsis thaliana*. *Cells* **11**, 2960.
- 604 **Tsuda K, Somssich IE.** 2015. Transcriptional networks in plant immunity. *New phytologist*  
605 **206**, 932–47.
- 606 **Wang L, Calabria J, Chen H-W, Somssich M.** 2022a. The *Arabidopsis thaliana* – *Fusarium*  
607 oxysporum strain 5176 pathosystem: an overview (M Höfte, Ed.). *Journal of Experimental*  
608 *Botany*, erac263.
- 609 **Wang W, Liu J, Mishra B, Mukhtar MS, McDowell JM.** 2022b. Sparking a sulfur war  
610 between plants and pathogens. *Trends in Plant Science*, 1–13.
- 611 **Wang X, Meng H, Tang Y, Zhang Y, He Y, Zhou J, Meng X.** 2022c. Phosphorylation of an  
612 ethylene response factor by MPK3/MPK6 mediates negative feedback regulation of pathogen-  
613 induced ethylene biosynthesis in *Arabidopsis*. *Journal of Genetics and Genomics* **49**, 810–822.
- 614 **Wang J, Zhang Y, Wu J, Meng L, Ren H.** 2013. AtFH16, an *Arabidopsis* type II formin, binds  
615 and bundles both microfilaments and microtubules, and preferentially binds to microtubules.  
616 *Journal of integrative plant biology* **55**, 1002–15.
- 617 **Waszczak C, Carmody M, Kangasjärvi J.** 2018. Reactive Oxygen Species in Plant Signaling.  
618 *Annual Review of Plant Biology* **69**, 209–236.
- 619 **Weber E, Engler C, Gruetzner R, Werner S, Marillonnet S.** 2011. A Modular Cloning  
620 System for Standardized Assembly of Multigene Constructs (J Peccoud, Ed.). *PLOS ONE* **6**,  
621 e16765.
- 622 **Wirthmueller L, Zhang Y, Jones JDG, Parker JE.** 2007. Nuclear Accumulation of the  
623 *Arabidopsis* Immune Receptor RPS4 Is Necessary for Triggering EDS1-Dependent Defense.  
624 *Current Biology* **17**, 2023–2029.
- 625 **Wu J, Liu Z, Zhang Z, et al.** 2016. Transcriptional regulation of receptor-like protein genes by

- 626 environmental stresses and hormones and their overexpression activities in *Arabidopsis thaliana*.  
627 *Journal of Experimental Botany* **67**, 3339–3351.
- 628 **Wu R, Lucke M, Jang Y, Zhu W, Symeonidi E, Wang C, Fitz J, Xi W, Schwab R, Weigel**  
629 **D.** 2018. An efficient CRISPR vector toolbox for engineering large deletions in *Arabidopsis*  
630 *thaliana*. *Plant Methods* **14**, 65.
- 631 **Yamada K, Yamashita-Yamada M, Hirase T, Fujiwara T, Tsuda K, Hiruma K, Saijo Y.**  
632 2016. Danger peptide receptor signaling in plants ensures basal immunity upon pathogen-  
633 induced depletion of BAK1. *The EMBO journal* **35**, 46–61.
- 634 **Yamaguchi Y, Huffaker A.** 2011. Endogenous peptide elicitors in higher plants. *Current*  
635 *Opinion in Plant Biology* **14**, 351–357.
- 636 **Yamaguchi Y, Huffaker A, Bryan AC, Tax FE, Ryan CA.** 2010. PEPR2 Is a Second Receptor  
637 for the Pep1 and Pep2 Peptides and Contributes to Defense Responses in *Arabidopsis*. *The Plant*  
638 *Cell* **22**, 508–522.
- 639 **Yamaguchi Y, Pearce G, Ryan CA.** 2006. The cell surface leucine-rich repeat receptor for  
640 AtPep1, an endogenous peptide elicitor in *Arabidopsis*, is functional in transgenic tobacco cells.  
641 *Proceedings of the National Academy of Sciences of the United States of America* **103**, 10104–9.
- 642 **Yang W, Devaiah SP, Pan X, Isaac G, Welti R, Wang X.** 2007. AtPLAI Is an Acyl Hydrolase  
643 Involved in Basal Jasmonic Acid Production and *Arabidopsis* Resistance to *Botrytis cinerea*.  
644 *Journal of Biological Chemistry* **282**, 18116–18128.
- 645 **Yang J, Duan G, Li C, Liu L, Han G, Zhang Y, Wang C.** 2019. The Crosstalks Between  
646 Jasmonic Acid and Other Plant Hormone Signaling Highlight the Involvement of Jasmonic Acid  
647 as a Core Component in Plant Response to Biotic and Abiotic Stresses. *Frontiers in Plant Science*  
648 **10**, 1–12.
- 649 **Yang F, Kimberlin AN, Elowsky CG, Liu Y, Gonzalez-Solis A, Cahoon EB, Alfano JR.**  
650 2018. A Plant Immune Receptor Degraded by Selective Autophagy. *Molecular Plant*, 1–39.
- 651 **Zipfel C, Oldroyd GED.** 2017. Plant signalling in symbiosis and immunity. *Nature* **543**, 328–  
652 336.



653

654

655 **Supplementary information:**

656 **Supplementary table 1: List of primers used to clone the promoters**

657 MAS-GG-ACS2p-F AACAGGTCTCAACCTCGGTCGATGTAAATGGATTAAATTTTATA  
658 MAS-GG-ACS2p-R AACAGGTCTCATGTTGCTGTGTCAATTCTCACTTCTTTG  
659 MAS-GG-ACS2pm-F AACAGGTCTCAGGTGTCCTCAAGGTTTCTGTTTCAAC  
660 MAS-GG-ACS2pm-R AACAGGTCTCACACCAAATAAAGTTGATGTGGGGTC  
661 MAS-GG-AOSp-F AACAGGTCTCAACCTACACTTAGACACCCCAATATTTTAGATTT  
662 MAS-GG-AOSp-R AACAGGTCTCATGTTCTATTCGAAACAGTGGCGAGT  
663 MAS-GG-AOSpm1-F AACAGGTCTCAGCCAATATTTTAGATTTTACTTTAAAGAAAT  
664 MAS-GG-AOSpm1-R AACAGGTCTCATGGCGTCTCTAAGTGTTTTTTTTT  
665 MAS-GG-AOSpm2-F AACAGGTCTCAGACACCTAAGTATTTTCTTTCCAACAA  
666 MAS-GG-AOSpm2-R AACAGGTCTCATGTCCTTCTCTTTGAATAAACCTCA  
667 MAS-GG-ARR5p-F AACAGGTCTCAACCTATATGATTTTTTCAAAGAAAACACCATTTAGT  
668 MAS-GG-ARR5p-R AACAGGTCTCATGTTATCAAGAAGAGTAGGATCGTGACTCGT  
669 MAS-GG-ARR5pm-F AACAGGTCTCAGATTAGGATTATCTTTATAGAATGTTTTGGTGC  
670 MAS-GG-ARR5pm-R AACAGGTCTCAAATCGTCTCGGTTTTTACCTCTCAAATAGTAT  
671 MAS-GG-ATG8Ap-F AACAGGTCTCAACCTTTAGCAGTGCTTAGTGAGCTTAAATTATAGTT  
672 MAS-GG-ATG8Ap-R AACAGGTCTCATGTTAATTAATAAACTCGATCGTCTGCTAGATCG  
673 MAS-GG-BAK1p-F AACAGGTCTCAACCTGTTTTTTGGAAACAGAGAGAAAACCTCA  
674 MAS-GG-BAK1p-R AACAGGTCTCATGTTTATCCTCAAGAGATTA AAAACAAACCCTA  
675 MAS-GG-BIK1p-F AACAGGTCTCAACCTCGTTCCCAAATCTCGGTCAATTG  
676 MAS-GG-BIK1p-R AACAGGTCTCATGTTCAAAGCTAAGAACAGATTCGTTTTCTTCTT  
677 MAS-GG-BIK1pm-F AACAGGTCTCAGTACATTCATTTGATTGGGATTTATCTTTTTA  
678 MAS-GG-BIK1pm-R AACAGGTCTCAGTACAGACCAAAAACAGTGGACTTGGG  
679 MAS-GG-BPS1p-F AACAGGTCTCAACCTAAAAAGAGAGTCACTTGGGTAAAGTGATTT  
680 MAS-GG-BPS1p-R AACAGGTCTCATGTTCTGATAAGTTTCAACTGAAAAAACAAGAA  
681 MAS-GG-CAD5p-F AACAGGTCTCAACCTGACTTGGGTTCAGTTAAAAAATCTCA  
682 MAS-GG-CAD5p-R AACAGGTCTCATGTTTTTGATGATTCTTTCTTTCTTTATC  
683 MAS-GG-CERK1p-F AACAGGTCTCAACCTGTATGAAGAAGGGTAACAATCAACTCTAA  
684 MAS-GG-CERK1p-R AACAGGTCTCATGTTTGAAGCTTCTTAGATTCCCCAGAGGAAGGGTGTCTGTT  
685 MAS-GG-CIPP1p-F AACAGGTCTCAACCTCAAACCAGACATACTTGCAGCTTCTC  
686 MAS-GG-CIPP1p-R AACAGGTCTCATGTTGAGAGTCAGATGTTCCACAAAAATCTACTC  
687 MAS-GG-CIPP1pm-F AACAGGTCTCAGTTTGCAATCTGTACTAGATAATATCGTGG  
688 MAS-GG-CIPP1pm-R AACAGGTCTCAAAAACGGATCTATATAACATATACGTATGCAATTA  
689 MAS-GG-CORK1p-F AACAGGTCTCAACCTGTACACTTATTAACATATATTTTTAATTTGTG  
690 MAS-GG-CORK1p-R AACAGGTCTCATGTTGTCGACGACCAAAAGATGTGAGA  
691 MAS-GG-CORK1pm-F AACAGGTCTCAAGCCTGTTATTCTTAGTATTGCTTTCTATTTAAG  
692 MAS-GG-CORK1pm-R AACAGGTCTCAGGCTTTAAACAATATAAAGCCCACAAG  
693 MAS-GG-CPK29p-F AACAGGTCTCAACCTAATGAGGTAATGGAGGTTATCTTATCGA  
694 MAS-GG-CPK29p-R AACAGGTCTCATGTTGTGAGCAAAGTAGATCGGTCTTCGA  
695 MAS-GG-CPK29pm-F AACAGGTCTCAAGACACCCCTCCAAGGGGCT  
696 MAS-GG-CPK29pm-R AACAGGTCTCAGTCTTAGGTTCTCCTATTCCTTTGCAA  
697 MAS-GG-CPK5pro-F AACAGGTCTCAACCTACCATGTGACTACGACAACACTACTGG  
698 MAS-GG-CPK5pro-R AACAGGTCTCATGTTGAAACAATGGGAATTACCAAATCC  
699 MAS-GG-CSLD2p-F AACAGGTCTCAACCTGACGACCAAGACTAGAGTTTTGGTTTCG  
700 MAS-GG-CSLD2p-R AACAGGTCTCATGTTAGTTAGGATCTAACTTGGCAGATCCCT  
701 MAS-GG-DORN1p-F AACAGGTCTCAACCTGATGTAAAATTTGAAGCTTGAAGATGAAC  
702 MAS-GG-DORN1p-R AACAGGTCTCATGTTGCAGATGATGAATCAGAGAGTCTGG  
703 MAS-GG-EDS16p-F AACAGGTCTCAACCTGACTGCAGAGATCAATTTCTTTTATTTTAT  
704 MAS-GG-EDS16p-R AACAGGTCTCATGTTGCAGAAATTCGTAAAGTGTTCCTGA  
705 MAS-GG-EDS16pm1-F AACAGGTCTCACACCGCGTCCAACATTTTAAAAACA  
706 MAS-GG-EDS16pm1-R AACAGGTCTCAGGTGTCAGACTCTCAGCTGAACATAATT  
707 MAS-GG-EDS16pm2-F AACAGGTCTCATCTGAAAGAGCCTAAGTGGGTTTCC  
708 MAS-GG-EDS16pm2-R AACAGGTCTCACAGACCAGTTTTTATCATTTAAAAAATATTGTTA

709 MAS-GG-EDS1p-F AACAGGTCTCAACCTGTTTATCAGATTCCACGTACGATATGTTCTT  
710 MAS-GG-EDS1p-R AACAGGTCTCATGTTGATCTATATCTATTCTTTTTCTTTAGTGGACTTTC  
711 MAS-GG-EDS1pm1-F AACAGGTCTCACGTGACCAAATCTGAAAACCCAAGT  
712 MAS-GG-EDS1pm1-R AACAGGTCTCACACGTATAGAAGAAATCTACTACTTTAACTCTGTT  
713 MAS-GG-EDS1pm2-F AACAGGTCTCACTCTCATGATGGGGTATTTTGGGGTAAC  
714 MAS-GG-EDS1pm2-R AACAGGTCTCAAGAGCATTTC AATGCAAAAATGGGT  
715 MAS-GG-EFRp-F AACAGGTCTCAACCTATCTAGACGATTAAGTAATTGAGCATGTA AAAAG  
716 MAS-GG-EFRp-R AACAGGTCTCATGTTGTCGATTATAAAAAGATAAAAAGAAAGGTTCTTCT  
717 MAS-GG-ELI3p-F AACAGGTCTCAACCTTAAAGTCGATGTTCTATATGTATTCAAAAATAAT  
718 MAS-GG-ELI3p-R AACAGGTCTCATGTTATGGATAAATAATAAGCGAATGGGA  
719 MAS-GG-ERF1p-F AACAGGTCTCAACCTCTCTCCCAATTGATATTTTTGTTATTTCT  
720 MAS-GG-ERF1p-R AACAGGTCTCATGTTGTAGAAAAATACTCTGTTTCTTGACTACTCTGT  
721 MAS-GG-EX1p-F AACAGGTCTCAACCTCCGCCGTCTTAAGTGGAATTTGG  
722 MAS-GG-EX1p-R AACAGGTCTCATGTTCCGCCGAGAGATGTGAGAGCG  
723 MAS-GG-FERp-F AACAGGTCTCAACCTAGAAAAGTTAAGAGTGGAAGTGGGA  
724 MAS-GG-FERp-R AACAGGTCTCATGTTTCGATCAAGAGCACTTCTCCGG  
725 MAS-GG-FH16p-F AACAGGTCTCAACCTCTGACCATAGTGTGGTAACTCAGATATTTT  
726 MAS-GG-FH16p-R AACAGGTCTCATGTTGGATCAGGAACCAAACAGATGATT  
727 MAS-GG-FLS2p-F AACAGGTCTCAACCTTTTTTGTAGAGAGATTTTTGTTGTTTTTGT  
728 MAS-GG-FLS2p-R AACAGGTCTCATGTTGGTTTAGACTTTAGAAAGAGTTGAAATTGTGG  
729 MAS-GG-FMO1p-F AACAGGTCTCAACCTCGAAAAATCCTTCGTCAATGTGTG  
730 MAS-GG-FMO1p-R AACAGGTCTCATGTTCTGAGAGAGGTTATGCTAGAGAGAAGAGAG  
731 MAS-GG-FRK1p-F AACAGGTCTCAACCTAAATTAACGCCTTTTTATCAACAAC  
732 MAS-GG-FRK1p-R AACAGGTCTCATGTTACTTAATTGAGCTGCTTTCTCTGG  
733 MAS-GG-FRK1pm-F AACAGGTCTCACGTCTCTTTACATTTGTGATGTGGT  
734 MAS-GG-FRK1pm-R AACAGGTCTCAGACGAACACTGATATAAAAAATCTCACA  
735 MAS-GG-GLR25p-F AACAGGTCTCAACCTGATAAGAAGTGATTCAGCTGGGGTTT  
736 MAS-GG-GLR25p-R AACAGGTCTCATGTTATTGATAGCTCGCAAGCTCAAATCTG  
737 MAS-GG-GLR25pm-F AACAGGTCTCAACCTCTCTACCCTGGTCGCAA  
738 MAS-GG-GLR25pm-R AACAGGTCTCAAGGTTTTCTCTTTTCAACGTACAATATTTACATGA  
739 MAS-GG-GLR27p-F AACAGGTCTCAACCTCACACACTGGTCACTTAATGGTTTATTTGA  
740 MAS-GG-GLR27p-R AACAGGTCTCATGTTCCAGATTGAGGAACTTTATGTCATTCTTTAAC  
741 MAS-GG-GLR27pm-F AACAGGTCTCAACTCAAAATGATGCGTATCATTAAATTCTATAGTTT  
742 MAS-GG-GLR27pm-R AACAGGTCTCAGAGTTTGAATTTTTAACAAAAGTCTTAAGTTATATCAG  
743 MAS-GG-GPAT5p-F AACAGGTCTCAACCTAAAAGCGTTTTAATTAGAGAGATTTTTGC  
744 MAS-GG-GPAT5p-R AACAGGTCTCATGTTCTTTTTGTTTTTGTCTCGAATATTATTTT  
745 MAS-GG-HPCA1p-F AACAGGTCTCAACCTAAACATAAGAGAAAACGCAAGTTGATGA  
746 MAS-GG-HPCA1p-R AACAGGTCTCATGTTCTTCAAACCCAAAAAGAACCTCTTATCA  
747 MAS-GG-HRMp-F AACAGGTCTCAACCTCTGAATATCTTCTTTTTGGTTGCTCTGA  
748 MAS-GG-HRMp-R AACAGGTCTCATGTTTCGTAATATCTCTCTGTTTTGCTCTGTTTT  
749 MAS-GG-LECRKVI2p-F AACAGGTCTCAACCTACAAAGTCAATTACTTCGAGTTTTTTTTCTG  
750 MAS-GG-LECRKVI2p-R AACAGGTCTCATGTTGGGTGAGCGAAGTAAAGAAGGAGATA  
751 MAS-GG-LYK5p-F AACAGGTCTCAACCTATTTTCTGTTAAGTTTGAACATTTGGTTGTAA  
752 MAS-GG-LYK5p-R AACAGGTCTCATGTTTTGTGGTGTCTGATCTGAAGAGG  
753 MAS-GG-LYK5pm-F AACAGGTCTCACAACAGACCAAGACCATCTTTATGTCC  
754 MAS-GG-LYK5pm-R AACAGGTCTCAGTTGGATCTCATGTGAAAGAGACACATT  
755 MAS-GG-LYM1p-F AACAGGTCTCAACCTATATCATCGGTAAGTCACTAGACTATTGAACG  
756 MAS-GG-LYM1p-R AACAGGTCTCATGTTTTGTGTTTAGGGTTTTACGAAATTCAA  
757 MAS-GG-MIK2p-F AACAGGTCTCAACCTGTAAATAACGTTGAACTCGCGG  
758 MAS-GG-MIK2p-R AACAGGTCTCATGTTACAGTTGCAGATTATCTCTCTACGGTC  
759 MAS-GG-MLO6p-F AACAGGTCTCAACCTAAATATACATTTGGTTGACATGTTTCTCATT  
760 MAS-GG-MLO6p-R AACAGGTCTCATGTTAGAACTCACAGAACAGTTCCAAGCAA  
761 MAS-GG-MPK3p-F AACAGGTCTCAACCTAAAAAATTCTGATCGAAAATAGCTTAC  
762 MAS-GG-MPK3p-R AACAGGTCTCATGTTCTCTCTCAATTGATCAAAGTCGA  
763 MAS-GG-MPK4p-F AACAGGTCTCAACCTGACTTGTGTTGTAATATAGAGGAAACATGTAATTAT  
764 MAS-GG-MPK4p-R AACAGGTCTCATGTTCCGAGCAA AATTCTCACAACAACG

765 MAS-GG-MPK6p-F AACAGGTCTCAACCTAACACAAGAGAAGAGATTTATTGCTTC  
766 MAS-GG-MPK6p-R AACAGGTCTCATGTTGACCGGTAAGATGAAAGCTTTT  
767 MAS-GG-MYB15p-F AACAGGTCTCAACCTGATGAATTTGAATAAACTAAACAAAATT  
768 MAS-GG-MYB15p-R AACAGGTCTCATGTTCTCTTTGATTTGTGATTGCTGATAAA  
769 MAS-MYB15m-F AGAGGACCATGGACACCTGAAGAAGATCAAATCTTT  
770 MAS-GG-MYB72p-F AACAGGTCTCAACCTACACGATCTCTTTTGAGATTAAAGAAG  
771 MAS-GG-MYB72p-R AACAGGTCTCATGTTCTTATTACACTACTTTCTTCTCTATAGCTACC  
772 MAS-GG-MYB72pm1-F AACAGGTCTCACGTTTTAAACTTTACCTTATGTCCAATCTCT  
773 MAS-GG-MYB72pm1-R AACAGGTCTCAACCGTGACGTAGCATGTGTGGGTC  
774 MAS-GG-MYB72pm2-F AACAGGTCTCAGCTCTCTCTACGAGTGAAGTGCCT  
775 MAS-GG-MYB72pm2-R AACAGGTCTCAGAGCCAAAAGCATGGAACGTACG  
776 MAS-GG-NET4Ap-F AACAGGTCTCAACCTTAAATCCTCTTCTCGTACATCACAT  
777 MAS-GG-NET4Ap-R AACAGGTCTCATGTTGGCTGCAAAAATCAATGGACC  
778 MAS-GG-PAD4p-F AACAGGTCTCAACCTAATTAGGGTTTTATCAGATTAAAGAGATTTACTGATT  
779 MAS-GG-PAD4p-R AACAGGTCTCATGTTGATTTGGATATCGAGTAGAGAGTTGCAGA  
780 MAS-GG-PDF12p-F AACAGGTCTCAACCTTCTACCAAAAATCTTTGGTGCTTGATC  
781 MAS-GG-PDF12p-R AACAGGTCTCATGTTGATGATTATTACTATTTGTTTTCAATGTATAGA  
782 MAS-GG-PEP1p-F AACAGGTCTCAACCTGAAGTCAAAAATGAGTCGAAAAATC  
783 MAS-GG-PEP1p-R AACAGGTCTCATGTTGAGATCTGATAAGACAGAGGAAAACTT  
784 MAS-GG-PEP2p-F AACAGGTCTCAACCTTGAAGCTCTTGTGAATAGAGAAGAGA  
785 MAS-GG-PEP2p-R AACAGGTCTCATGTTGAAATCCAATAGTTTGGTGAGTTATC  
786 MAS-GG-PEP3p-F AACAGGTCTCAACCTGCACCTTAAAGTTACATTGTTTAGTCTAATTATT  
787 MAS-GG-PEP3p-R AACAGGTCTCATGTTCTGTTGACTTCTTAATCTTTTTTTGGGAA  
788 MAS-GG-PEPR1p-F AACAGGTCTCAACCTAGAGAAGGAAAACAACCATGTATTCCAG  
789 MAS-GG-PEPR1p-R AACAGGTCTCATGTTCTGAGTTTAAAGATCGAGAAACATGCAG  
790 MAS-GG-PEPR1pm-F AACAGGTCTCAGAAACCAACATCTCGTCATAAAAAAC  
791 MAS-GG-PEPR1pm-R AACAGGTCTCATTCTCTGTATACCAACGATTGTGAGA  
792 MAS-GG-PEPR2p-F AACAGGTCTCAACCTAGTTTGAAGATGGAGTTCATTGTG  
793 MAS-GG-PEPR2p-R AACAGGTCTCATGTTGAGATTAGAGCTCAAGAGACTGAAATAT  
794 MAS-GG-PER5p-F AACAGGTCTCAACCTCAGTGCGTAGTAGTGAGTTTCTTCA  
795 MAS-GG-PER5p-R AACAGGTCTCATGTTATTTGTAGATCTCACTTGGTATATATTTTCGTAC  
796 MAS-GG-PER5pm-F AACAGGTCTCAGACGAATATATATAATTAGCTACTAAATTAAT  
797 MAS-GG-PER5pm-R AACAGGTCTCACGTCTCAGAACGAGTGAATGATTC  
798 MAS-GG-PLP1p-F AACAGGTCTCAACCTCTGATCATCTAGCCTCTTCCC  
799 MAS-GG-PLP1p-R AACAGGTCTCATGTTAATAGTTGATCGATCTTCTTTTGAGTTAA  
800 MAS-GG-PMR4p-F AACAGGTCTCAACCTGCTCGATGTGATTTGAGACGTAGT  
801 MAS-GG-PMR4p-R AACAGGTCTCATGTTAGTAGCATGTGGTAGATCTTAGAAAATTTCTCG  
802 MAS-GG-PR1pm-F AACAGGTCTCACTCCCTCCATATAAAAAAGTTTGATTTTATAG  
803 MAS-GG-PR1pm-R AACAGGTCTCAGGAGAATCATTTTATAAGTTAAAACAAGCTTG  
804 MAS-GG-PR1pro-F AACAGGTCTCAACCTATATAACGATCATTGATTAGTATATACATATTG  
805 MAS-GG-PR1pro-R AACAGGTCTCATGTTTCTAAGTTGATAATGGTTATTGTTGT  
806 MAS-GG-RALF23p-F AACAGGTCTCAACCTGGTGATTCCGGTTTCCGACG  
807 MAS-GG-RALF23p-R AACAGGTCTCATGTTTCTTCTGTACACTGTAGCTTTAGCTCTCTC  
808 MAS-GG-RALF23pm-F AACAGGTCTCAGAGCACTCATAATTGTACAAAATAAAAGTAAATG  
809 MAS-GG-RALF23pm-R AACAGGTCTCAGCTCTCCTTCCATGATTGAGACTATTTT  
810 MAS-GG-RBOHDp-F AACAGGTCTCAACCTGACTTGTAAATTGCTCTCTTAGTCTTA  
811 MAS-GG-RBOHDp-R AACAGGTCTCATGTTTGAATTCGAGAAACCAAAAAGATC  
812 MAS-GG-RBHOFp-F AACAGGTCTCAACCTACCGGTTGAAAATAAGAGTGGTGGAA  
813 MAS-GG-RBOHFp-R AACAGGTCTCATGTTAGATCCAAAGTCGGAATTCAAAGAGTT  
814 MAS-GG-RBOHFpm-F AACAGGTCTCATGCAGAAGATAGTGAAGATAGTTGCAGAA  
815 MAS-GG-RBOHFpm-R AACAGGTCTCATGCAACTTTTATAGTTTTTTCGAACGAAAGTA  
816 MAS-GG-RCD1p-F AACAGGTCTCAACCTGGAGGAGCAGATTGGACACCGT  
817 MAS-GG-RCD1p-R AACAGGTCTCATGTTCTATATATTAACAATACTAAACCTATAACCTTGATAG  
818 MAS-GG-RCD1pm-F AACAGGTCTCAATACGTCTCATATAGTTATGCTGATTCTTTCTTG  
819 MAS-GG-RCD1pm-R AACAGGTCTCAGTATGATCCTGTAATATCATTCCTTCAAAAA  
820 MAS-GG-RFO1p-F AACAGGTCTCAACCTATATTAACCATGCATGCAAAACAAA

821 MAS-GG-RFO1p-R AACAGGTCTCATGTTTTTTTTTCTCTAATGACTTTTATGTATG  
822 MAS-GG-RLP26p-F AACAGGTCTCAACCTGATTAAGGATTGATCGGTAAACAAC  
823 MAS-GG-RLP26p-R AACAGGTCTCATGTTGGTGTGTTGTGATTGAACCAACAAGT  
824 MAS-GG-RLP29p-F AACAGGTCTCAACCTCCAGCAAAAAGCTTCTTCTACTCAA  
825 MAS-GG-RLP29p-R AACAGGTCTCATGTTAGGTTTTGGTGTAAAGAGAGAGGAAAGA  
826 MAS-GG-RPS4p-F AACAGGTCTCAACCTCGAGAACCTTGCCGAACCTTGTC  
827 MAS-GG-RPS4p-R AACAGGTCTCATGTTGGCCCAAAAGCTTTTTCCCGGT  
828 MAS-GG-SCOOP12p-F AACAGGTCTCAACCTAATAGGTTTTCGAGTACTGTATTGATGTTAACTG  
829 MAS-GG-SCOOP12p-R AACAGGTCTCATGTTCTCGATCTTTATTTTTTTCTCGAGTTTGA  
830 MAS-GG-SOBIR1p-F AACAGGTCTCAACCTTTTCGATTTTTCTAATCTCACAGCTGTTT  
831 MAS-GG-SOBIR1p-R AACAGGTCTCATGTTAATTAGAGAAAGTTTCTTCTTGTGGATGTT  
832 MAS-GG-SULTR41p-F AACAGGTCTCAACCTATGATCCATCACACGCCTGCCT  
833 MAS-GG-SULTR41p-R AACAGGTCTCATGTTGATGGCTCTTGCGCACGCTTGG  
834 MAS-GG-SULTR42p-F AACAGGTCTCAACCTGTAGCTCCACGCCCTTGCTAA  
835 MAS-GG-SULTR42p-R AACAGGTCTCATGTTCCGGAATTGGTGGGATAGAGAAGAAT  
836 MAS-GG-TET8p-F AACAGGTCTCAACCTCGGATGTATCAAAGGTAAAAATATC  
837 MAS-GG-TET8p-R AACAGGTCTCATGTTGGTTTTAGATTTCAGAGAGAAAGATTG  
838 MAS-GG-TUB6p-F AACAGGTCTCAACCTATTTAGAGGGTGTATTGGTTTGTG  
839 MAS-GG-TUB6p-R AACAGGTCTCATGTTCTTCTATTTTATCTGAAATCAACATTACA  
840 MAS-GG-TUB6pm1-F AACAGGTCTCATAACAAAAAGTTATGAATATTCACAGACATA  
841 MAS-GG-TUB6pm1-R AACAGGTCTCAGTTATGGTTAACCAGGATGAGC  
842 MAS-GG-TUB6pm2-F AACAGGTCTCAGAGGCCATTTTTTTTTCCCGT  
843 MAS-GG-TUB6pm2-R AACAGGTCTCACCTCATTGCGTATGACAATGCG  
844 MAS-GG-VSP2p-F AACAGGTCTCAACCTTCTCTCTGGTTATATTTTGTGCTGCTT  
845 MAS-GG-VSP2p-R AACAGGTCTCATGTTGTTTTTATGGTATGGTTTATTGTTAGTTTGTG  
846 MAS-GG-WAKL22p-F AACAGGTCTCAACCTATATTAACCATGCATGCAAACAAA  
847 MAS-GG-WAKL22p-R AACAGGTCTCATGTTTTTTTTTCTCTAATGACTTTTATGTATG  
848 MAS-GG-WRKY11p-F AACAGGTCTCAACCTTAGTTCCAAAACCGCATTGACAT  
849 MAS-GG-WRKY11p-R AACAGGTCTCATGTTGATGATTTCTTGGTCTGAGGATTTT  
850 MAS-GG-WRKY11pm-F AACAGGTCTCAGACGAAACTGTTGATTGCTTTATTCC  
851 MAS-GG-WRKY11pm-R AACAGGTCTCACGTCTCCTCAAAGTTCGAGGTTACT  
852 MAS-GG-WRKY17p-F AACAGGTCTCAACCTGTCTCGCAGAGGTTATTTATCTACTTGGTT  
853 MAS-GG-WRKY17p-R AACAGGTCTCATGTTGATGAGAAACCAGAGGAGAAACTTGAAG  
854 MAS-GG-WRKY17pm1-F AACAGGTCTCAGGTCAACGATTCCCATGTCGCTAA  
855 MAS-GG-WRKY17pm1-R AACAGGTCTCAGACCTAACCGACTAATATATATGATTGTGCTG  
856 MAS-GG-WRKY17pm2-F AACAGGTCTCAAAGCAGACCAAACCTTGATTACTTTATTCCATA  
857 MAS-GG-WRKY17pm2-R AACAGGTCTCAGCTTGAGTTGTGAGATATGTAGGGTCTTCTT  
858 MAS-GG-WRKY33p-F AACAGGTCTCAACCTCGCTGCTTTTTTCGAGATAGATAG  
859 MAS-GG-WRKY33p-R AACAGGTCTCATGTTACGAAAAATGGAAGTTTGTTTTATAA  
860 MAS-GG-WRKY40p-F AACAGGTCTCAACCTTGTGTATAACTATTATGCAGCCTTTTTCAA  
861 MAS-GG-WRKY40p-R AACAGGTCTCATGTTGTAATAATATGTAGGATGAATCTTCGATATGGGT  
862 MAS-GG-WRKY40pm-F AACAGGTCTCATAACAAGAATAGGTACAGTCCGTTTGTG  
863 MAS-GG-WRKY40pm-R AACAGGTCTCATGTAATTGTGAATAATAAAATCTTAATTCAGAT  
864 MAS-GG-WRKY53p-F AACAGGTCTCAACCTATCTTGTGAGCTGATTCAAAGATTTC  
865 MAS-GG-WRKY53p-R AACAGGTCTCATGTTTTAGTATATGATTCCCAAAATAGATTTTTT  
866 MAS-GG-WRKY70p-F AACAGGTCTCAACCTCATTGTAGATATGATATATGAAGCTTCCCC  
867 MAS-GG-WRKY70p-R AACAGGTCTCATGTTGTTAGTTTTGAGGAAGTTTTTGGTGAG  
868 MAS-GG-WRKY70pm-F AACAGGTCTCAGTATCTCGCATATTAAGTTAGGCTAGAGAGC  
869 MAS-GG-WRKY70pm-R AACAGGTCTCAATACTATGATAAACCAGTTGGTTCTGTAGCG  
870 MAS-GG-XLG2p-F AACAGGTCTCAACCTGAGTGGAGGAGCATAGTGTGATTATTTAC  
871 MAS-GG-XLG2p-R AACAGGTCTCATGTTCTTCTTACCCAATCAAGCACACATACAA



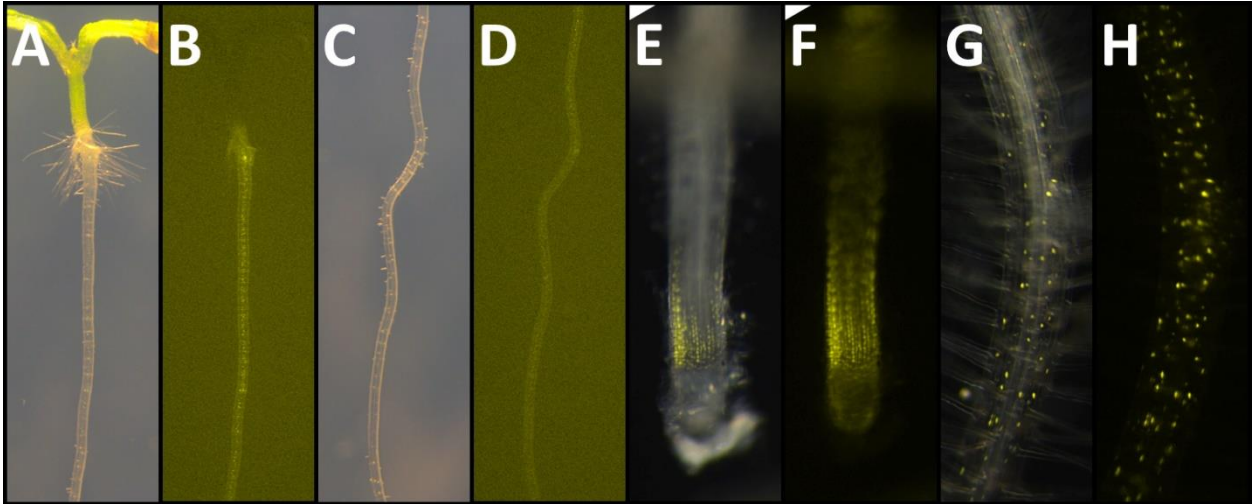

**Figure S1: Expression pattern of *PEP1* and *PEP2***

**A-D** shows the expression of *PEP1* (yellow). Robust expression is found in the inner root tissues of the mature DZ (A, B). From the young to mature DZ, expression gradually becomes stronger (C, D). No expression in the root tip, MZ or EZ. **E-H** shows the expression of *PEP2* (yellow). Expression is found in the EZ of the tip, then disappears in the young DZ (E, F), and returns to all tissues in the mature DZ (G, H). A, C, E, G are bright field images plus fluorescence, B, D, F, H are fluorescence only.

872

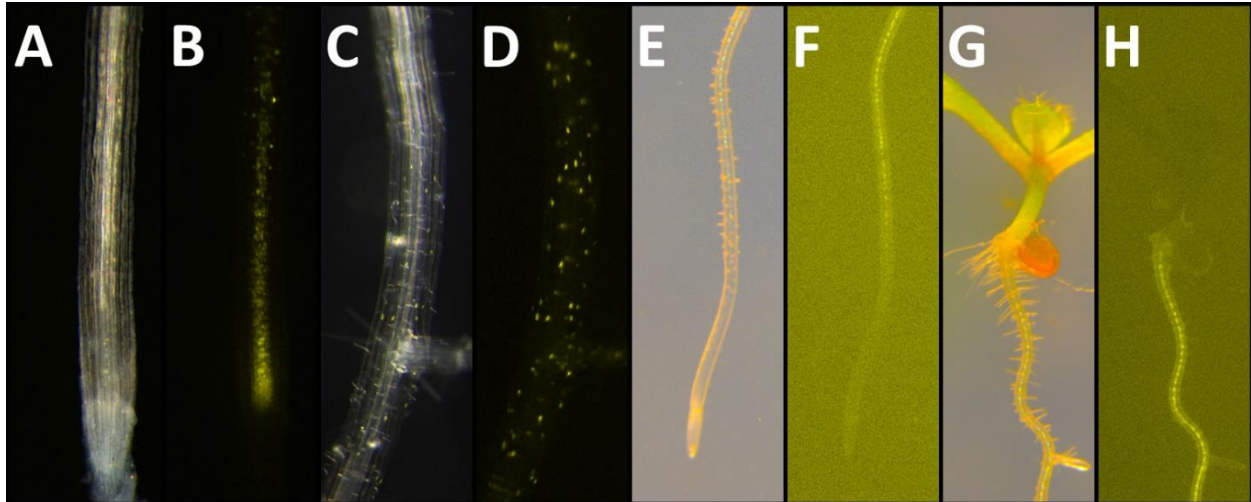

**Figure S2: Expression pattern of *PEPR1* and *PEPR2***

**A-D** shows the expression of *PEPR1* (yellow). Weak expression is found in vasculature of the MZ, EZ and young DZ (A, B). In the mature DZ, weak expression is found in all tissues (C, D). **E-H** shows the expression of *PEPR2* (yellow). Strong expression is found in the vasculature of the DZ, starting in the root hair zone (E, F) and becoming stronger in the mature DZ (G, H). A, C, E, G are bright field plus fluorescence, B, D, F, H are fluorescence only.

873

874

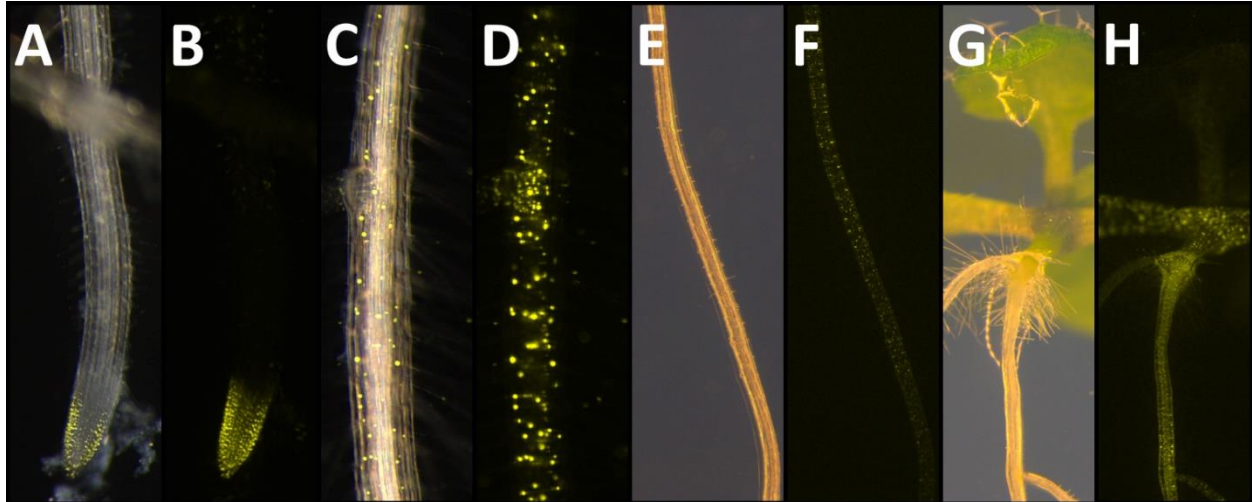

**Figure S3: Expression pattern of *BIK1* and *RBOHD***

**A-D** shows the expression of *BIK1* (yellow). Expression is found in the root tip around the meristem, including the root cap and part of the EZ (A, B). Expression appears stronger in the outer tissues compared to the vasculature. Further up the root, expression is robust in the mature DZ, but still stronger in the outer tissues (C, D). **E-H** shows the expression of *RBOHD* (yellow). *RBOHD* is expressed in all cells and tissues from the young DZ onwards (E, F). Expression is strongest in differentiated tissue (G, H), A, C, E, G are bright field plus fluorescence, B, D, F, H are fluorescence only.

875
